# Supplementary material for: Cascade bicyclization of triethylammonium thiolates with hydrazines: efficient access to pyrazolo[3,4-c]quinolines
Source: Royal Society of Chemistry journal article supplement (doi:10.1039/c6ob01728b), 2016-01-01
Supplement: c6ob01728b1.pdf [file c6ob01728b1.pdf]

## Supporting information

### Cascade bicyclization of triethylammonium thiolates with hydrazines: efficient access to pyrazolo[3,4-*c*]quinolines

Wei Fan,<sup>a</sup> Yan-Rong Li,<sup>a</sup> Bo Jiang,<sup>\*,b,c</sup> and Guigen Li<sup>\*,a,b</sup>

<sup>a</sup>Institute of Chemistry & BioMedical Sciences, Collaborative Innovation Center of Chemistry for Life Sciences,  
Nanjing University, Nanjing, 210093, P. R. China

<sup>b</sup>Department of Chemistry and Biochemistry, Texas Tech University, Lubbock, Texas 79409-1061, United States

<sup>c</sup>School of Chemistry and Chemical Engineering, Jiangsu Normal University, Xuzhou, 221116, P. R. China

[jiangchem@jsnu.edu.cn](mailto:jiangchem@jsnu.edu.cn); [guigen.li@ttu.edu](mailto:guigen.li@ttu.edu)

## Table of Contents

Copies of <sup>1</sup>H and <sup>13</sup>C NMR Spectra for Compounds **3a-3hh**-----S2-S35

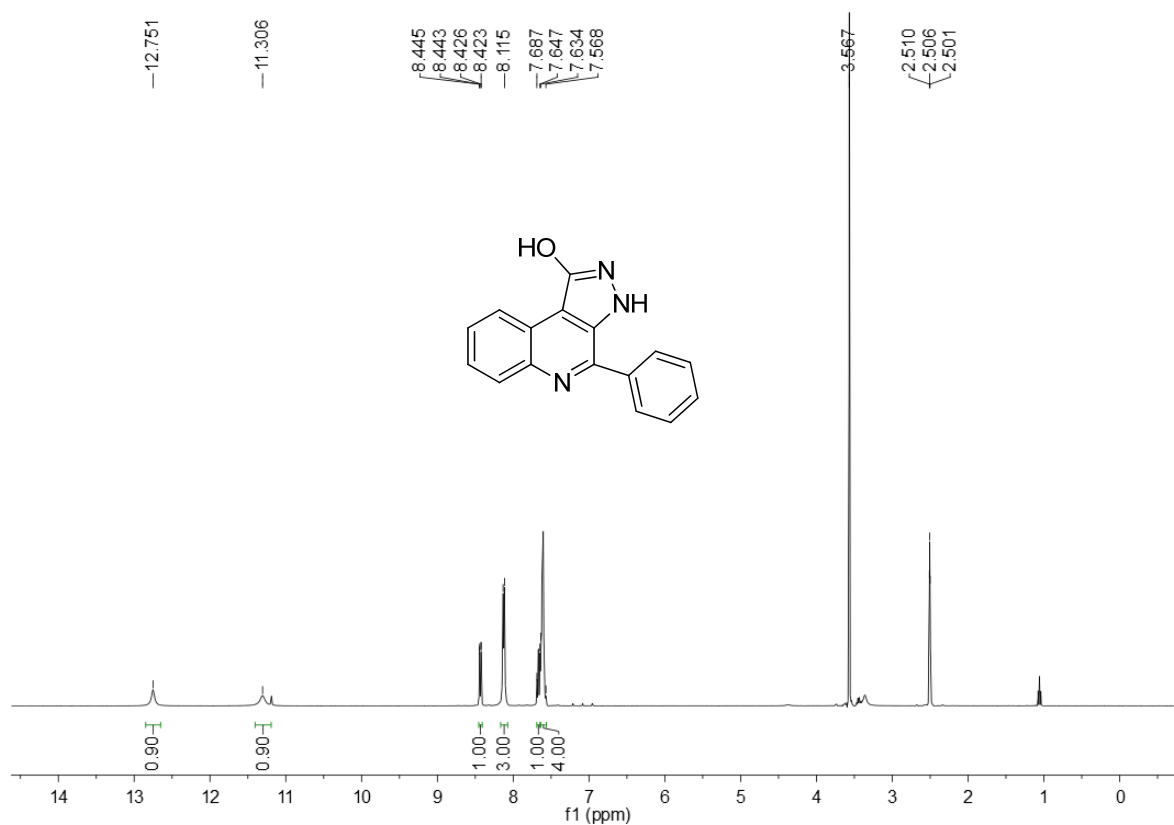

**<sup>1</sup>H NMR Spectrum of Compound 3a**

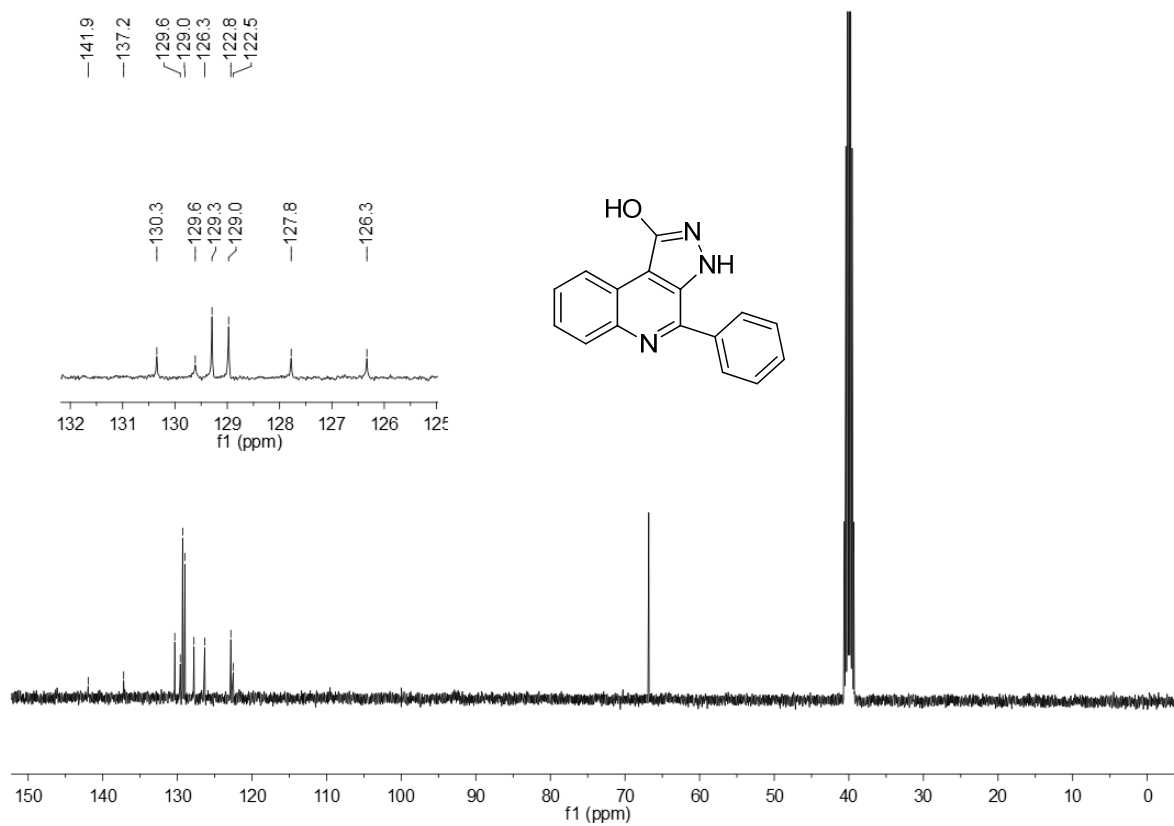

**<sup>13</sup>C NMR Spectrum of Compound 3a**

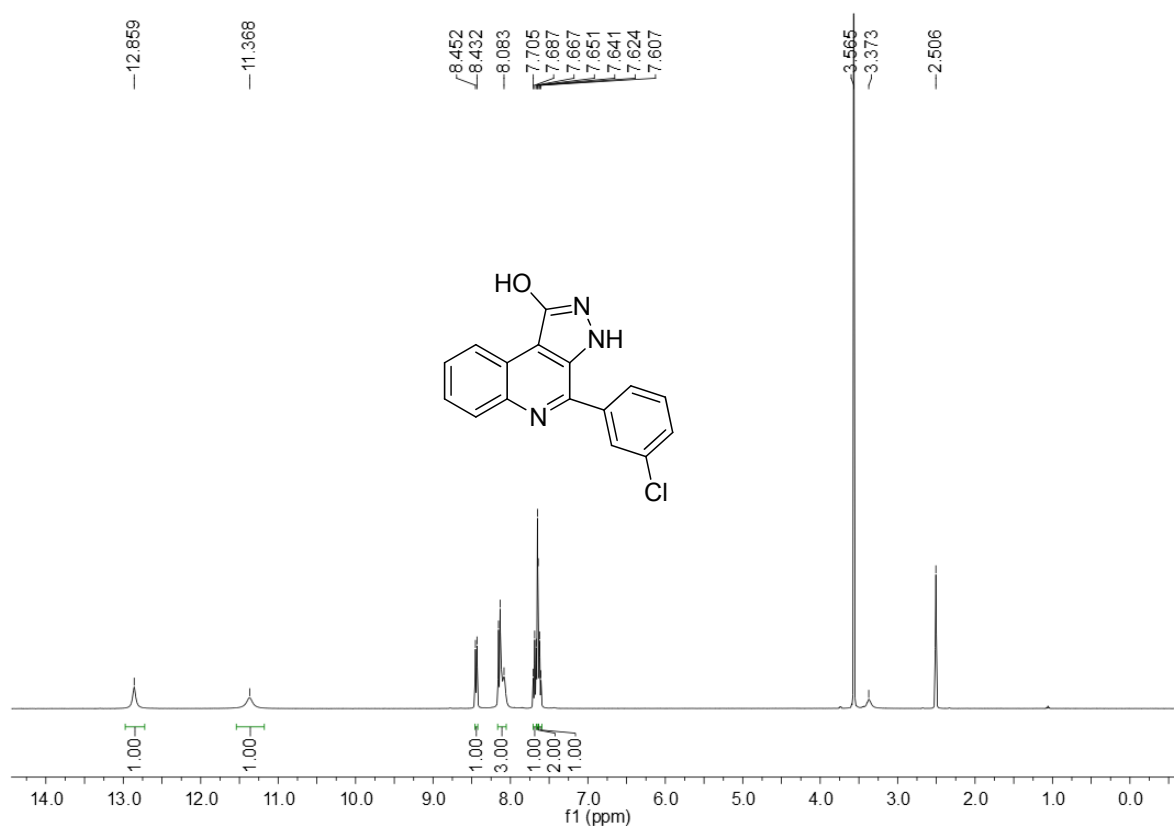

**<sup>1</sup>H NMR Spectrum of Compound 3b**

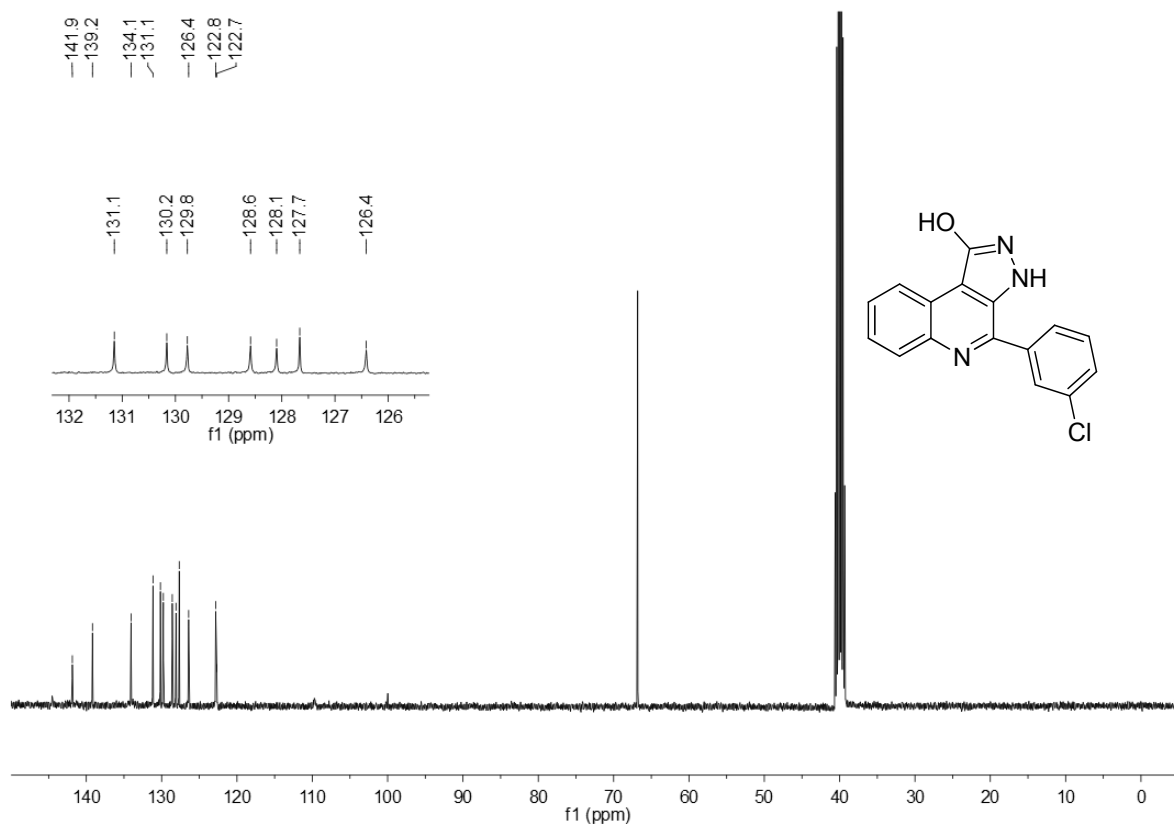

**<sup>13</sup>C NMR Spectrum of Compound 3b**

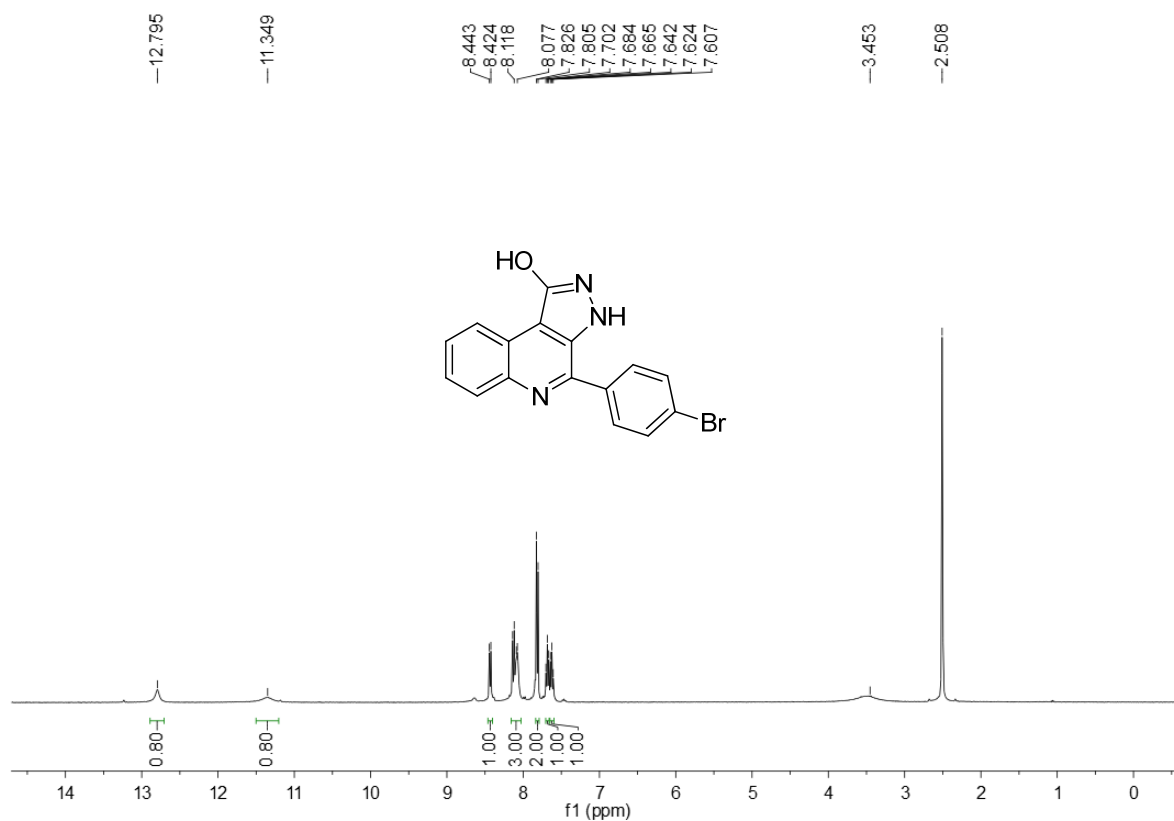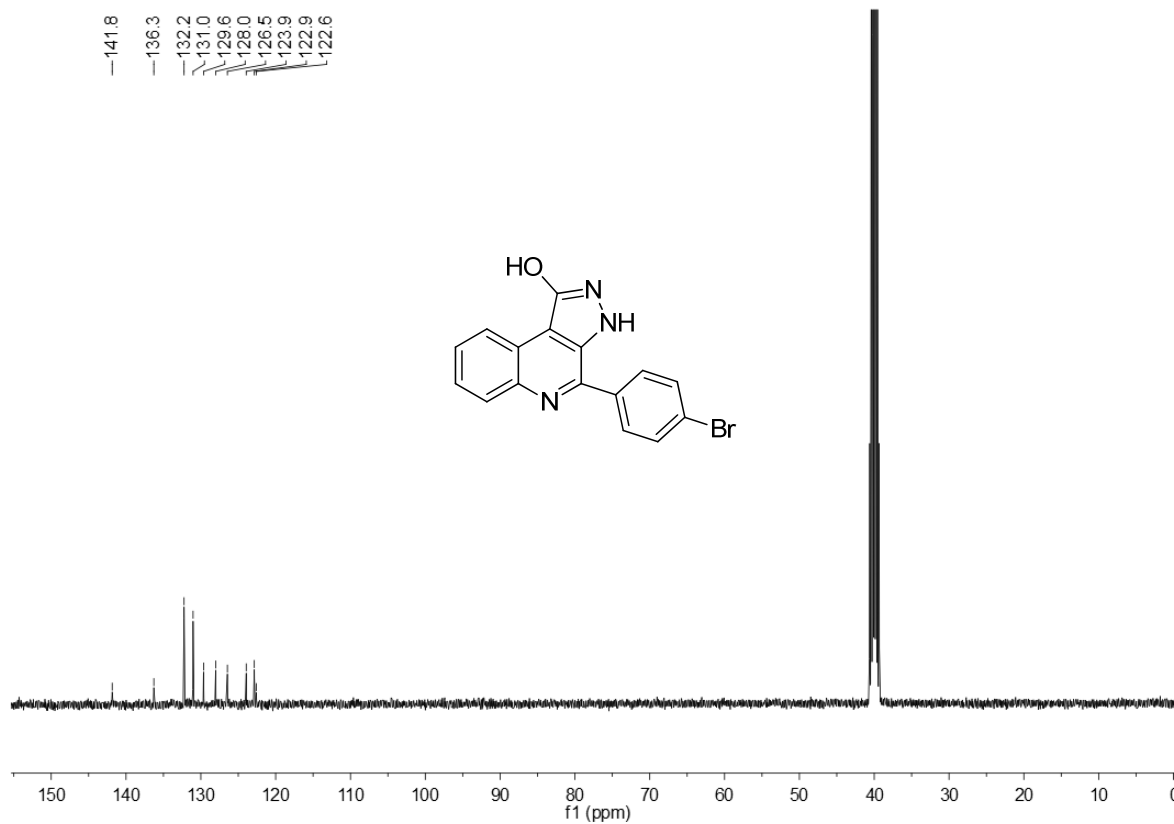

**<sup>13</sup>C NMR Spectrum of Compound 3c**

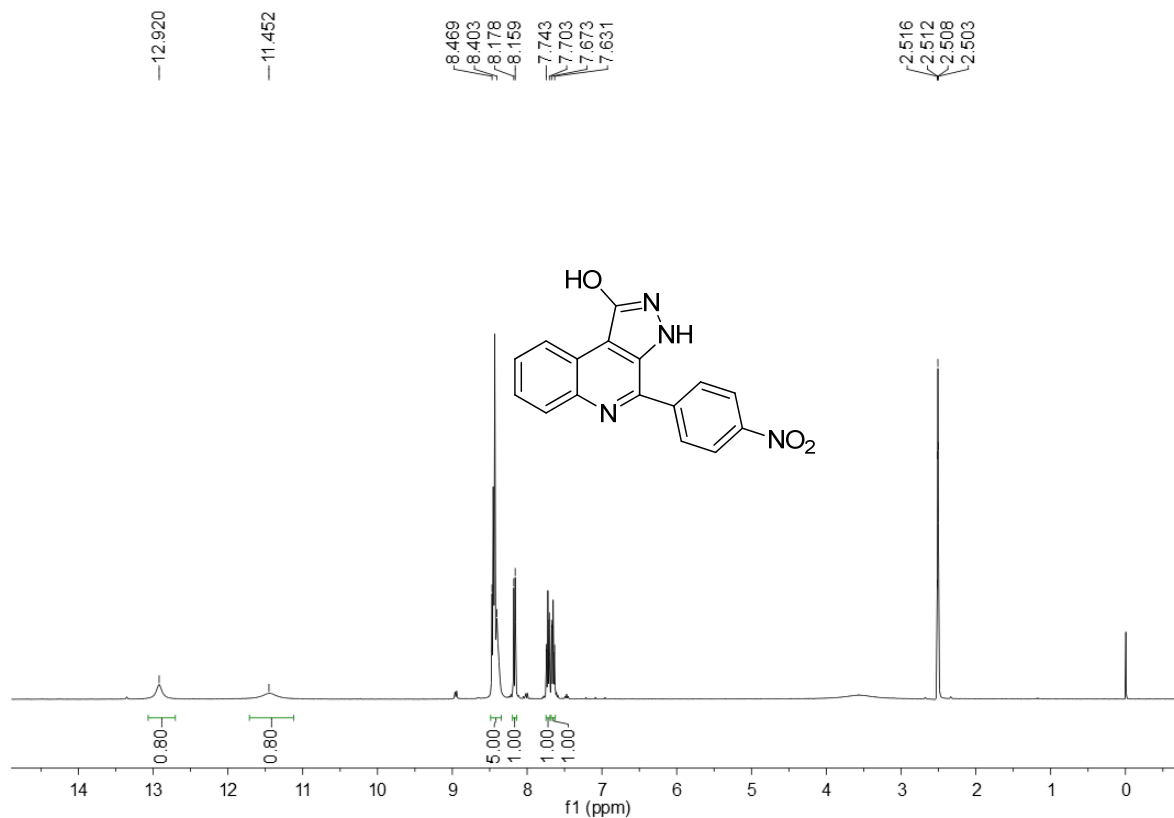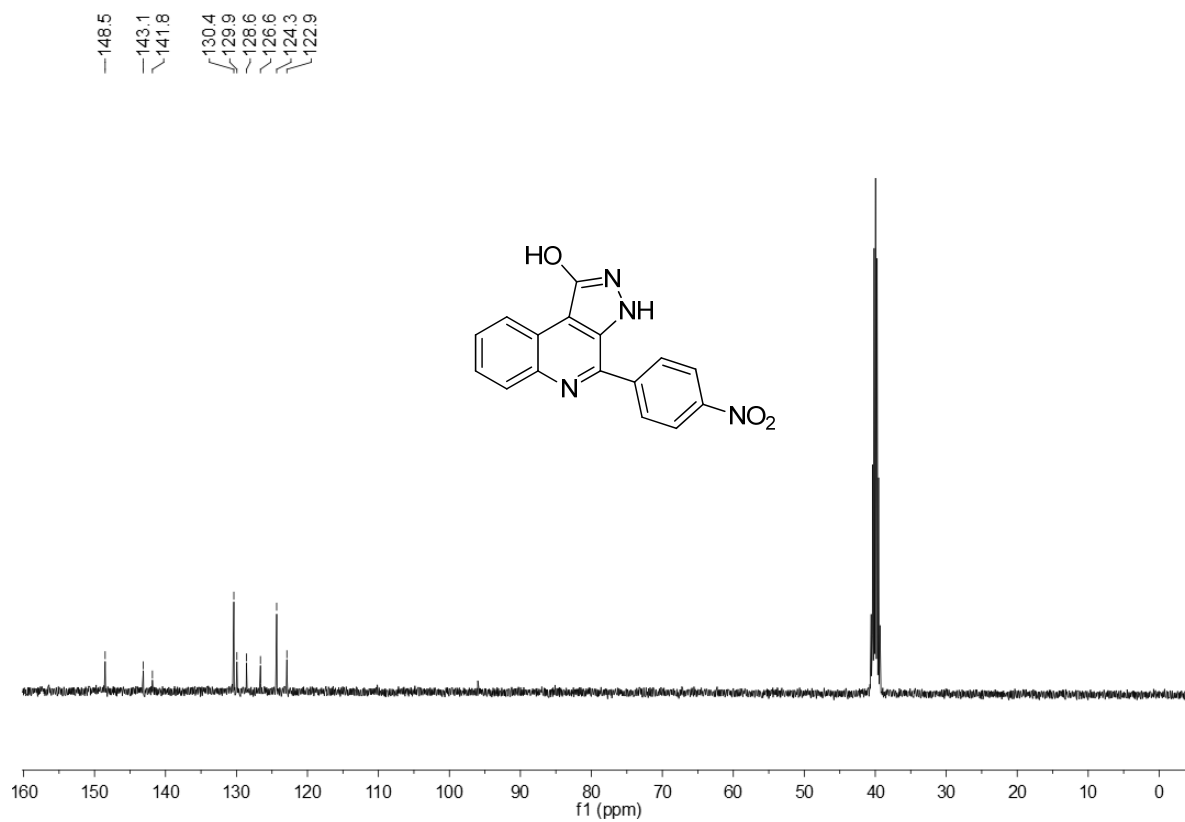

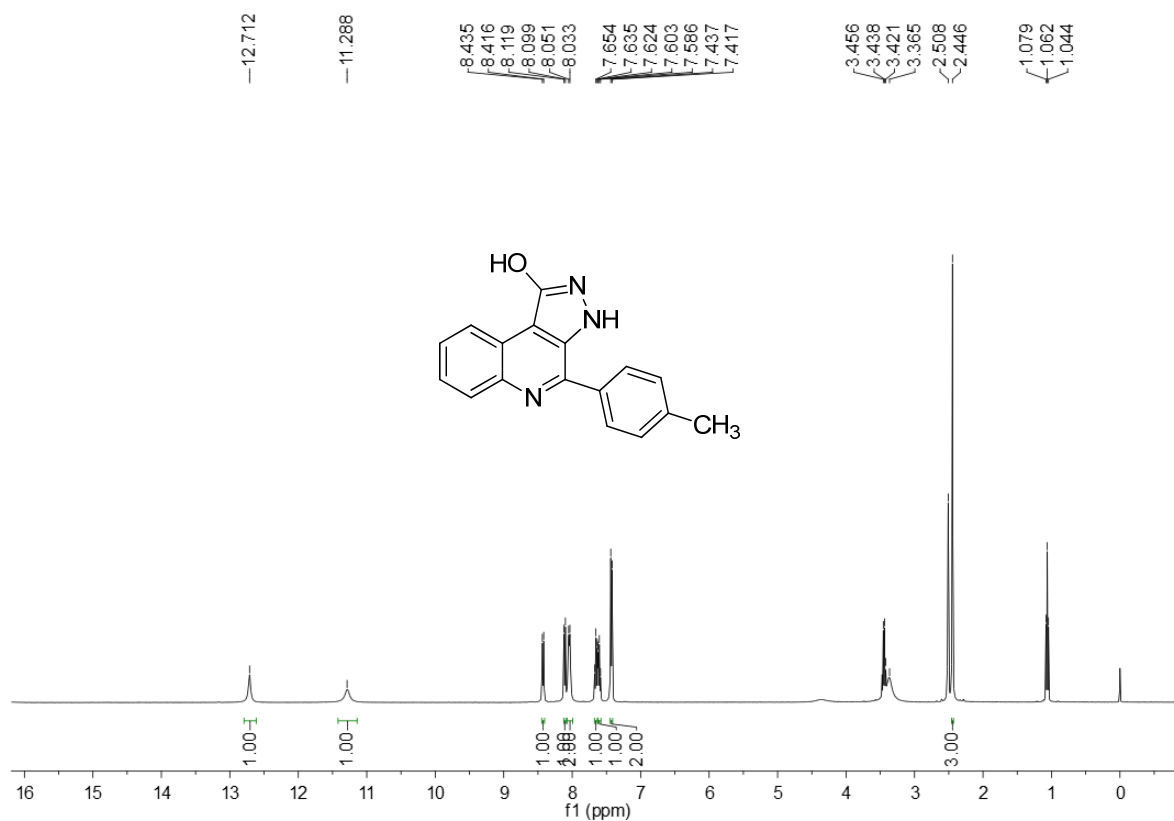

<sup>1</sup>H NMR Spectrum of Compound 3e

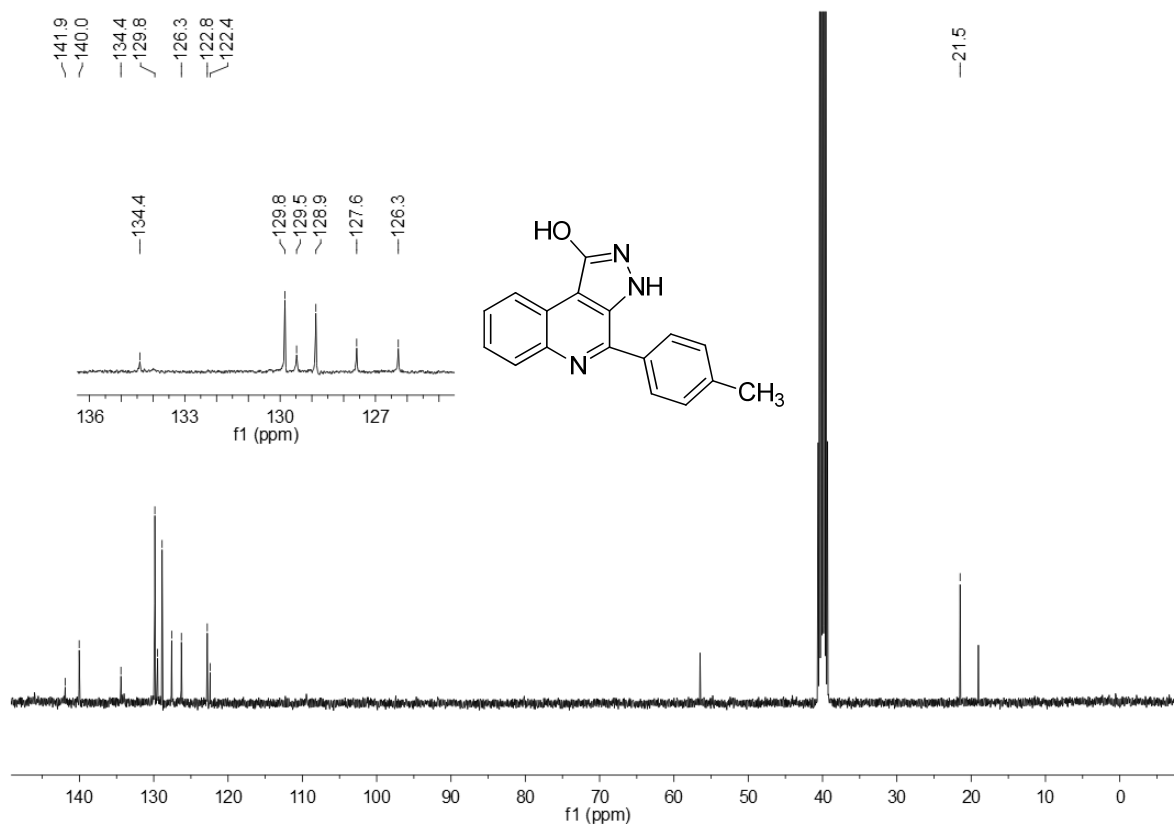

<sup>13</sup>C NMR Spectrum of Compound 3e

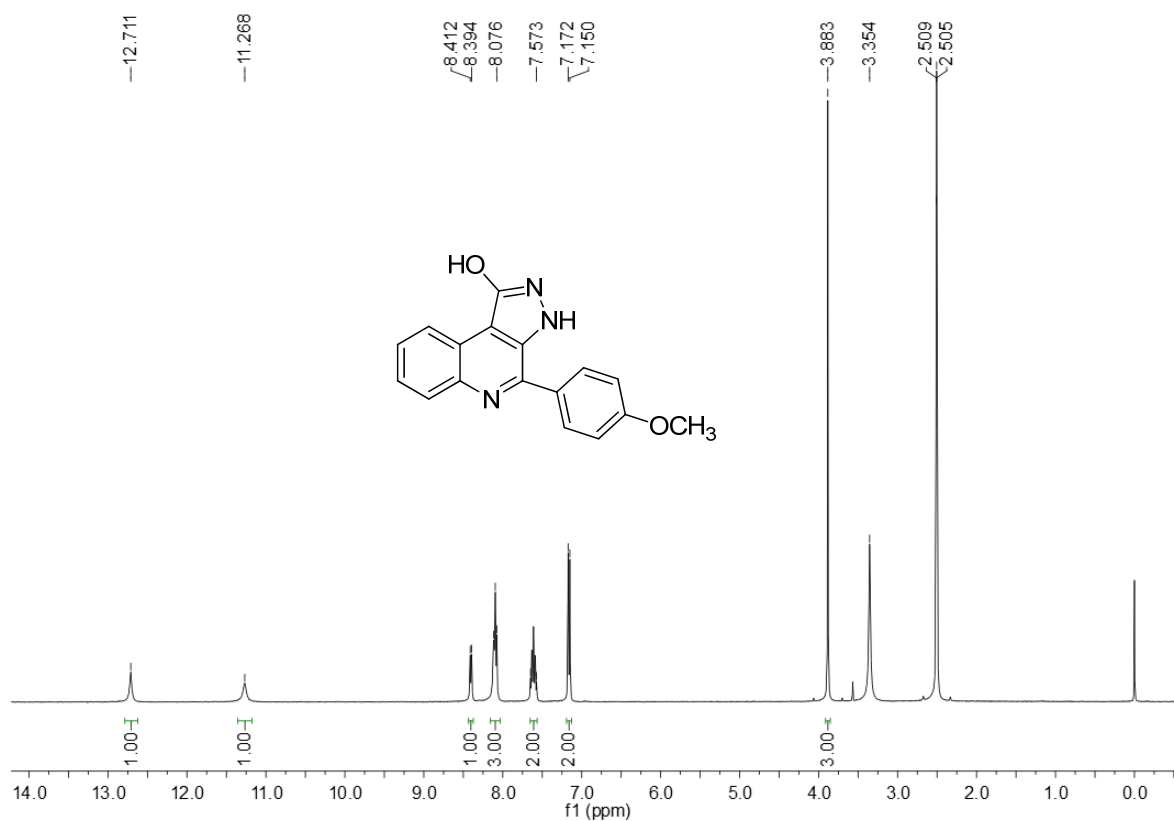

**<sup>1</sup>H NMR Spectrum of Compound 3f**

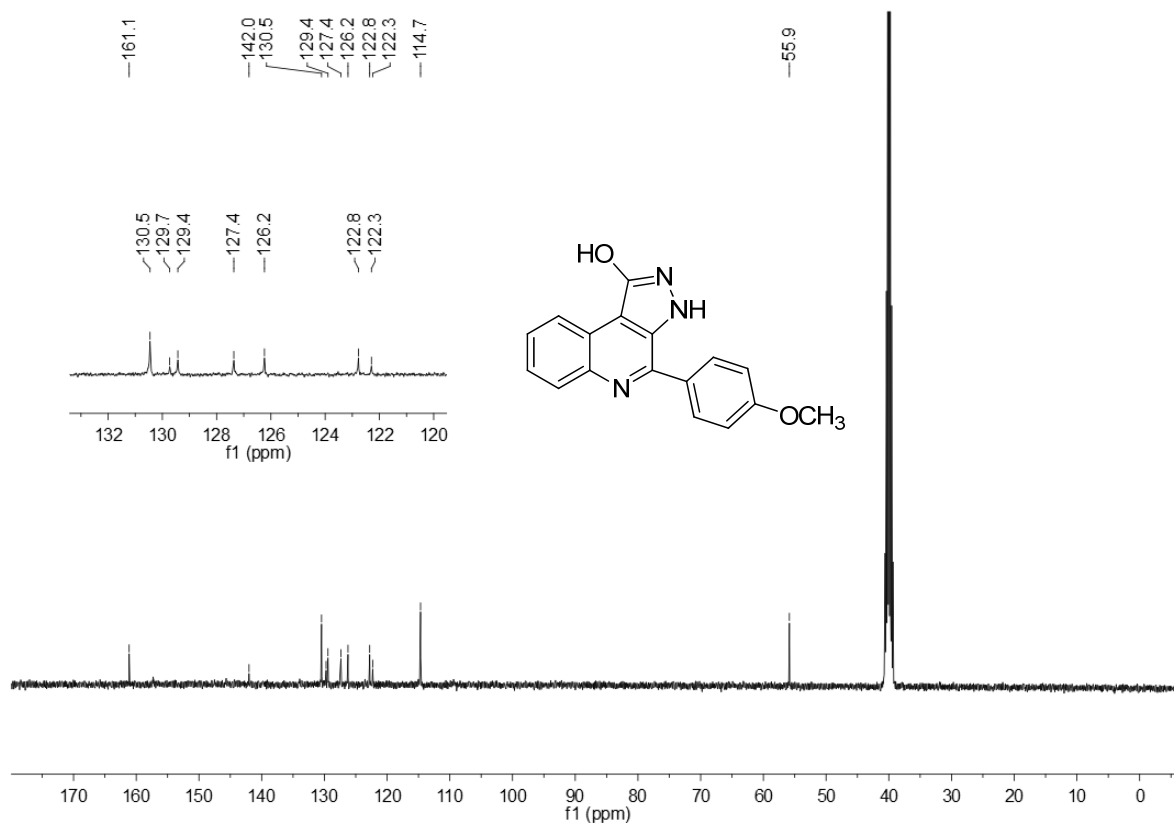

**<sup>13</sup>C NMR Spectrum of Compound 3f**

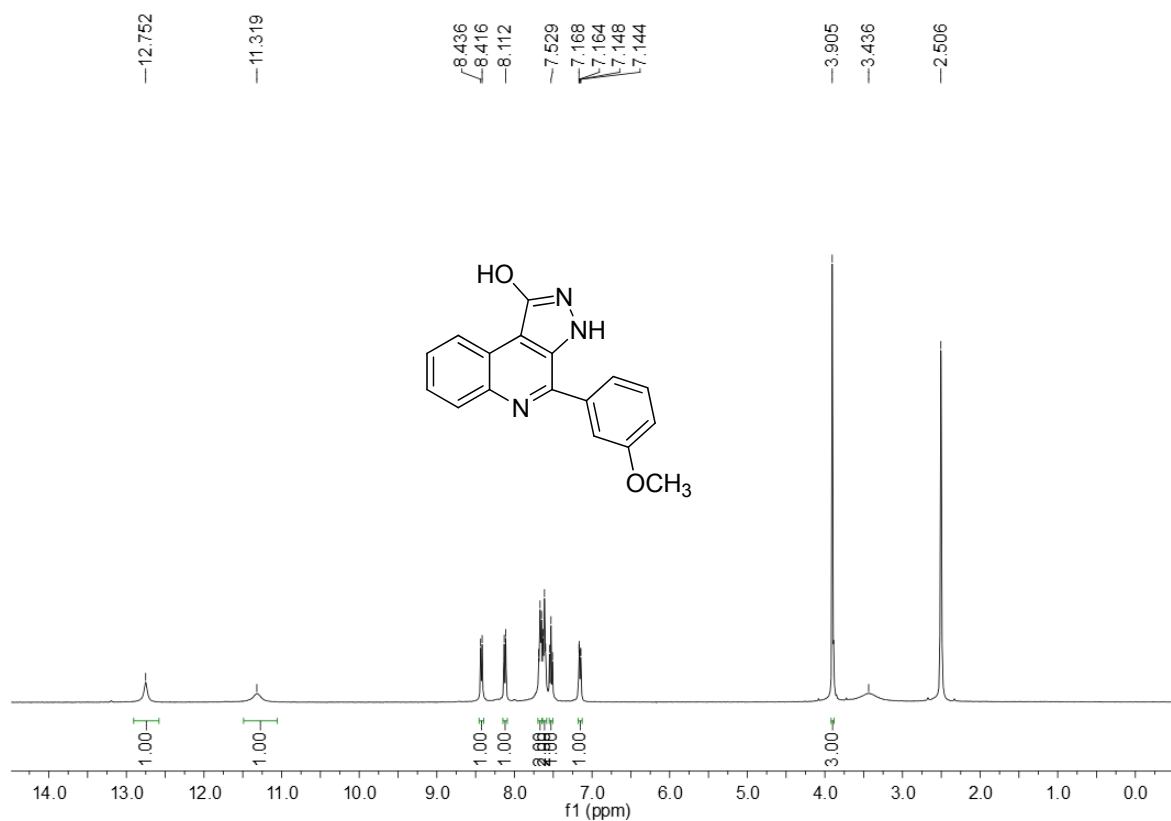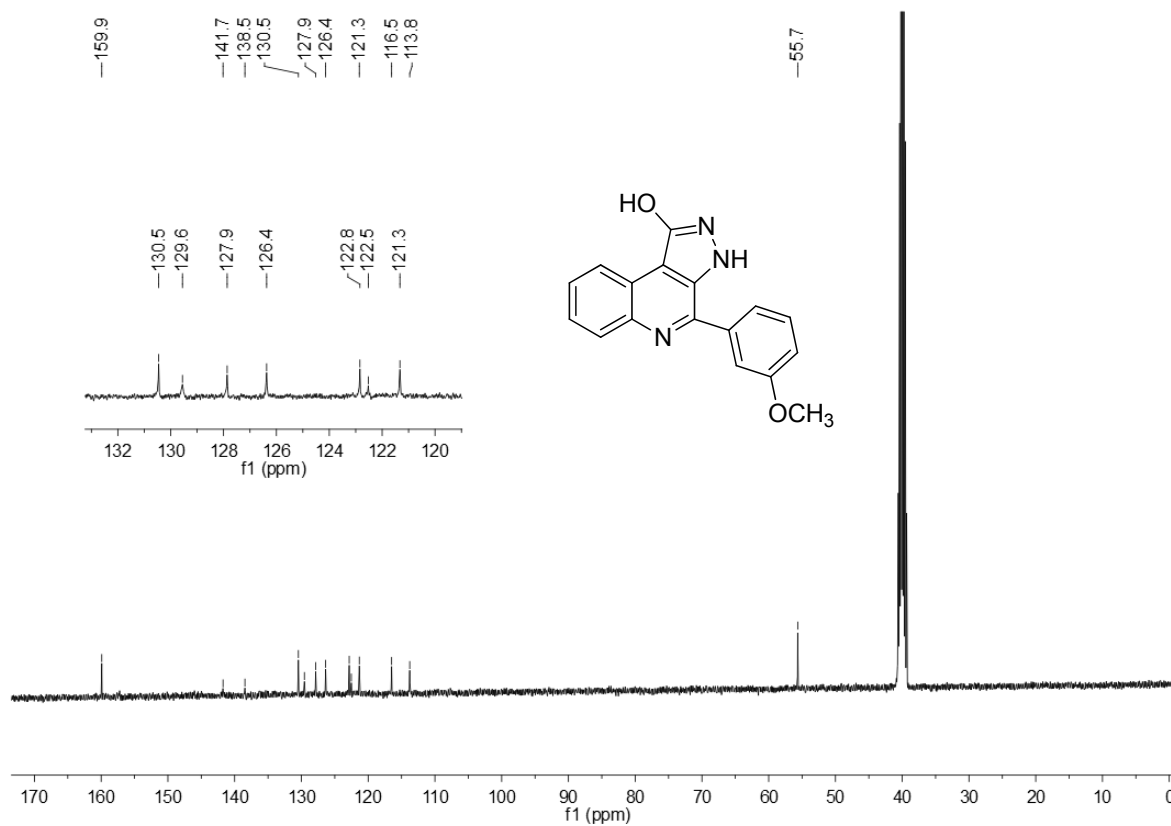

<sup>13</sup>C NMR Spectrum of Compound 3g



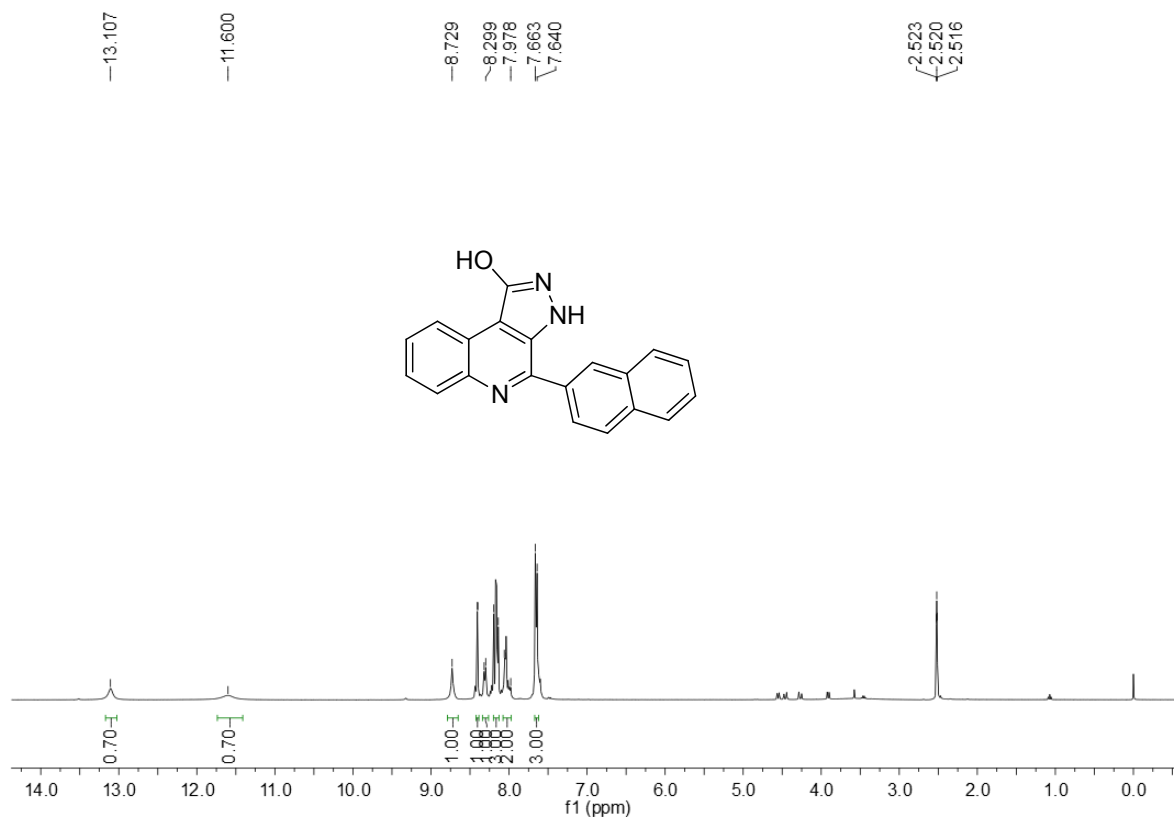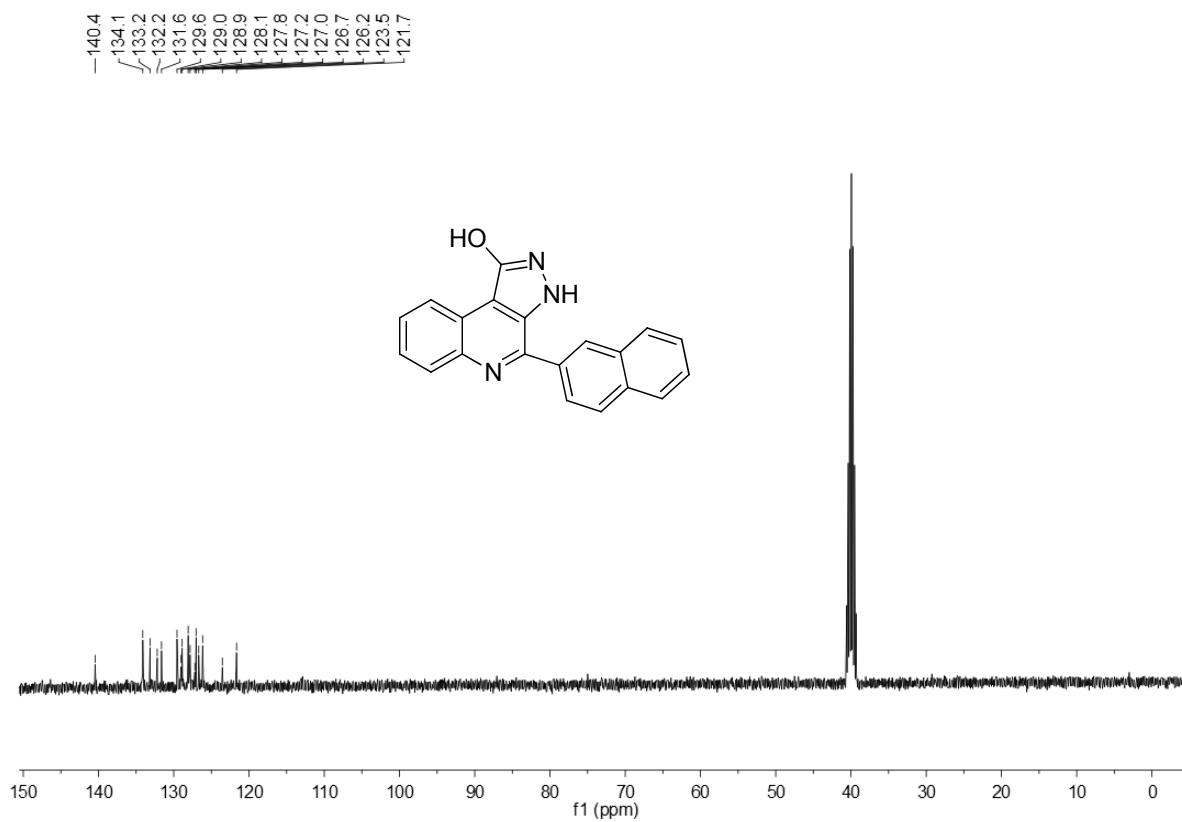

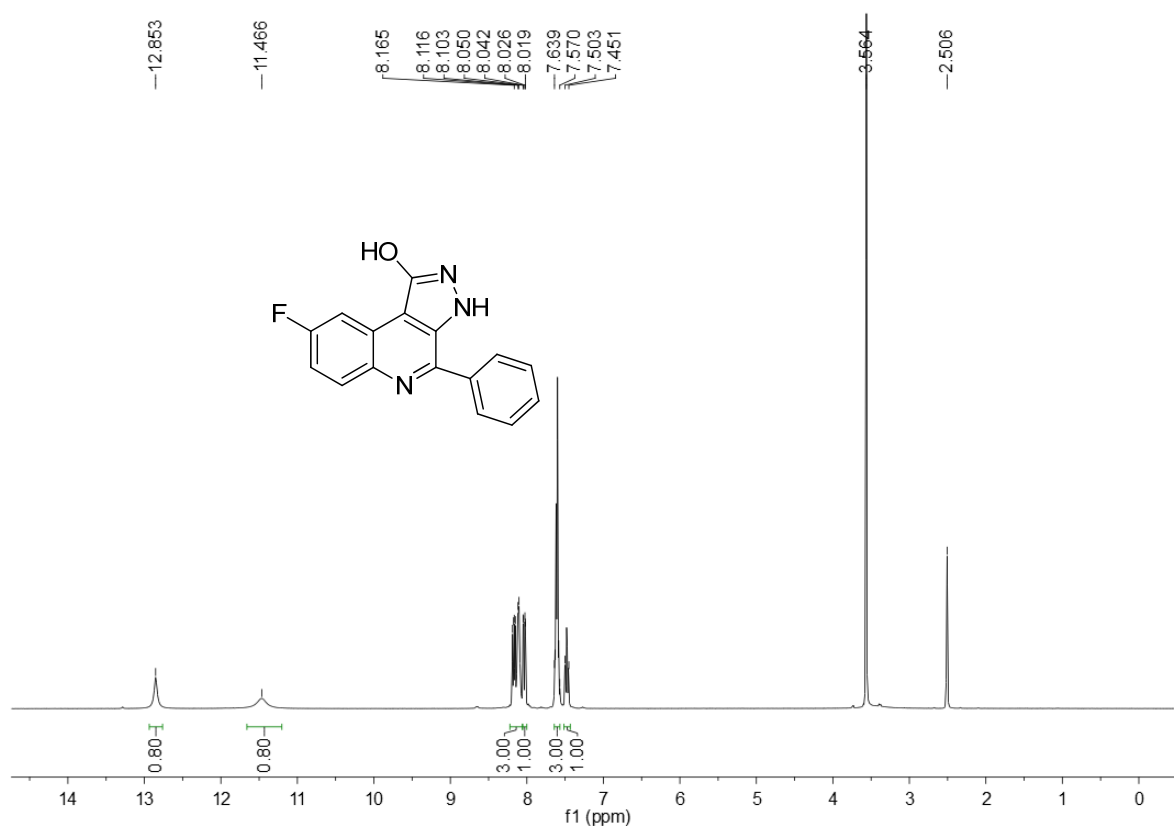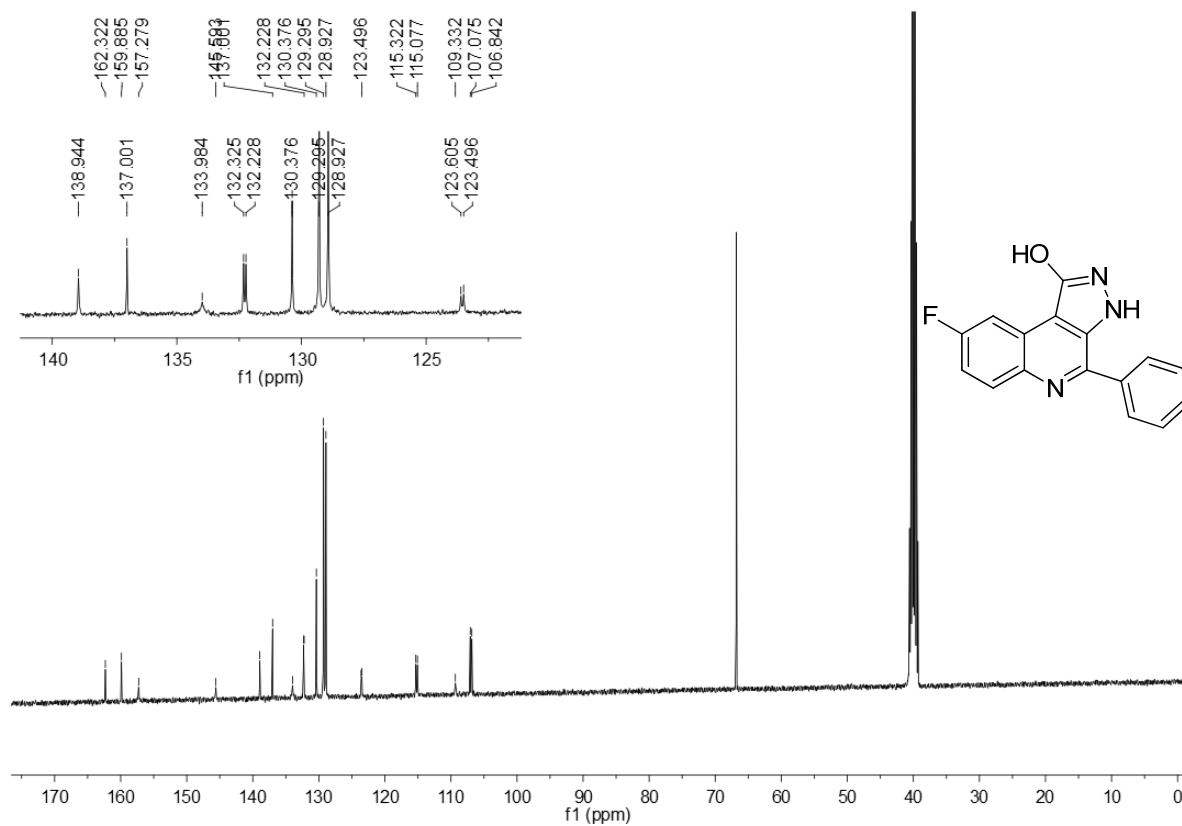

**<sup>13</sup>C NMR Spectrum of Compound 3i**

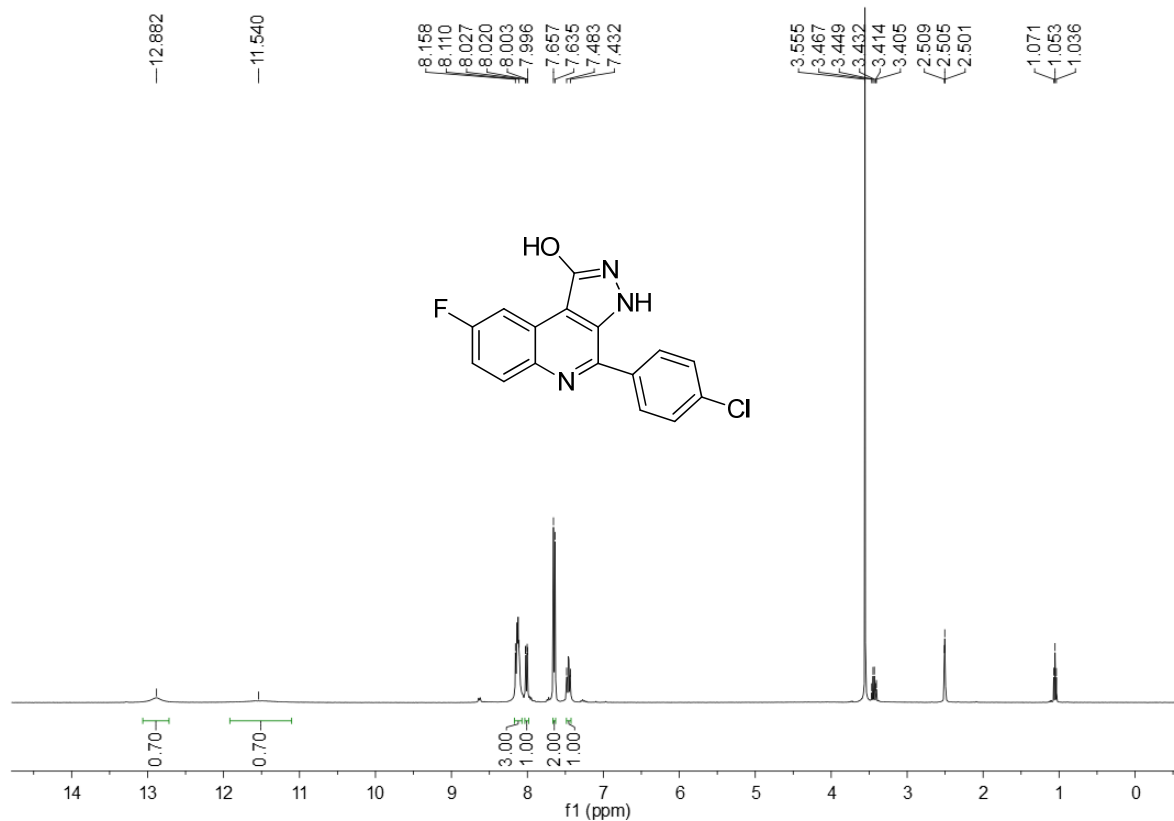

**<sup>1</sup>H NMR Spectrum of Compound 3j**

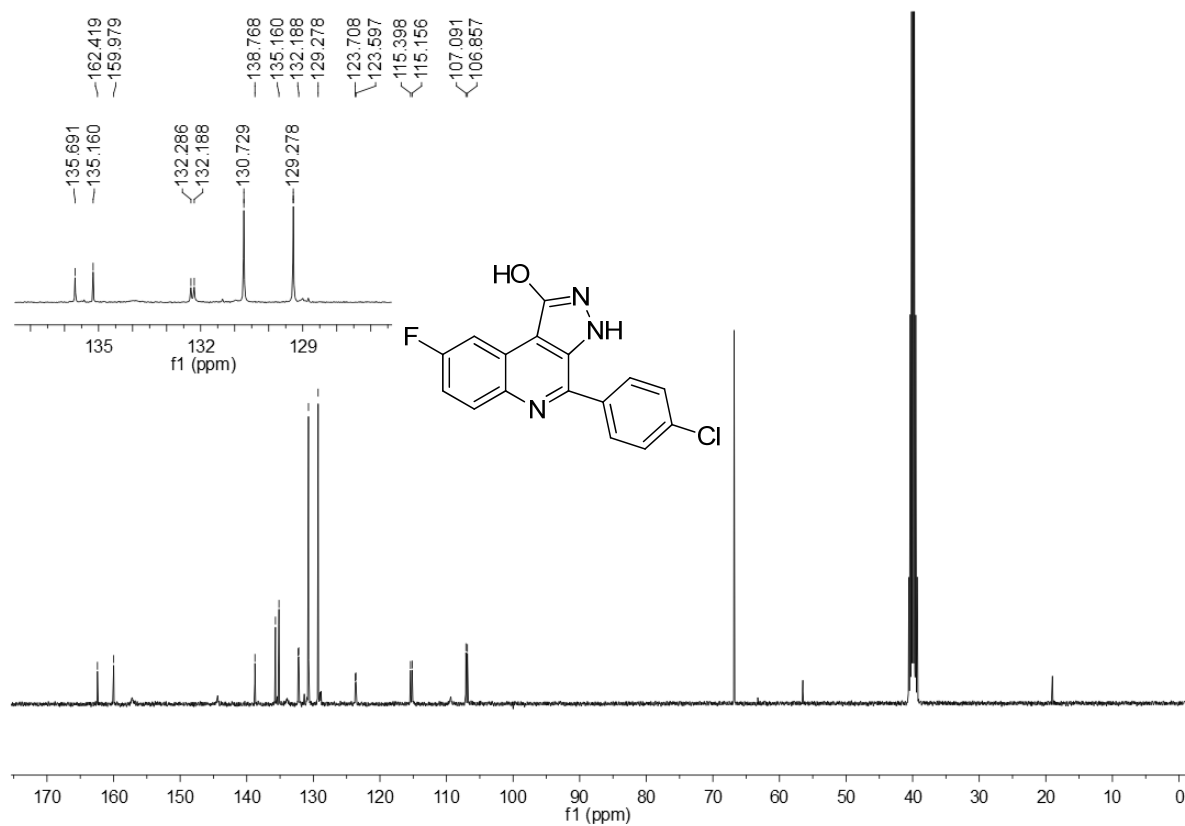

**<sup>13</sup>C NMR Spectrum of Compound 3j**

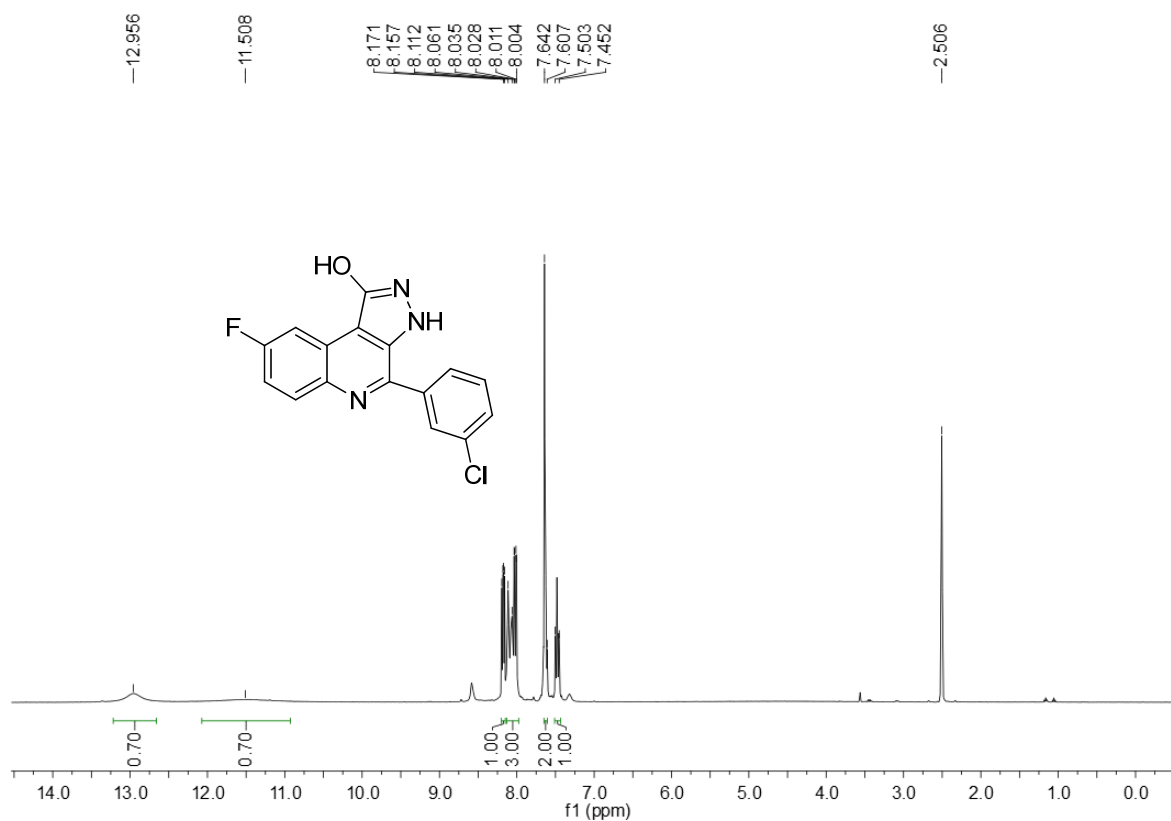

**<sup>1</sup>H NMR Spectrum of Compound 3k**

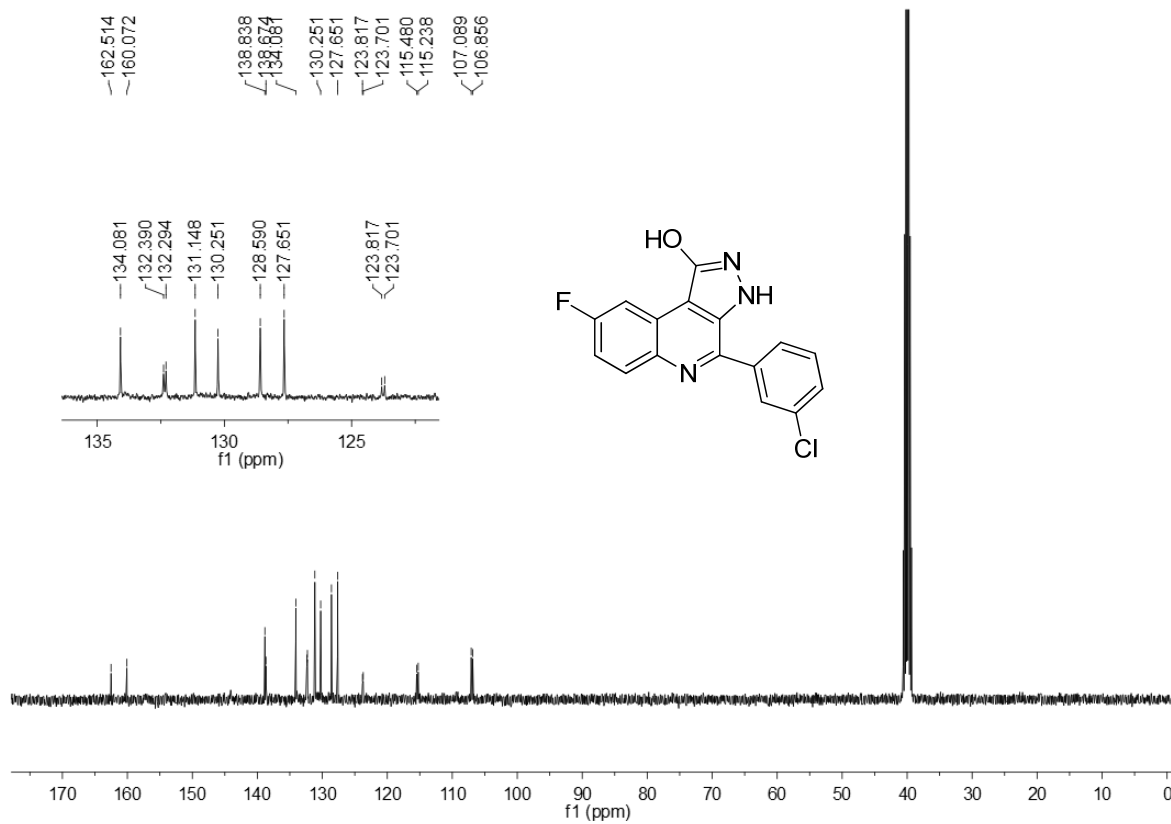

**<sup>13</sup>C NMR Spectrum of Compound 3k**

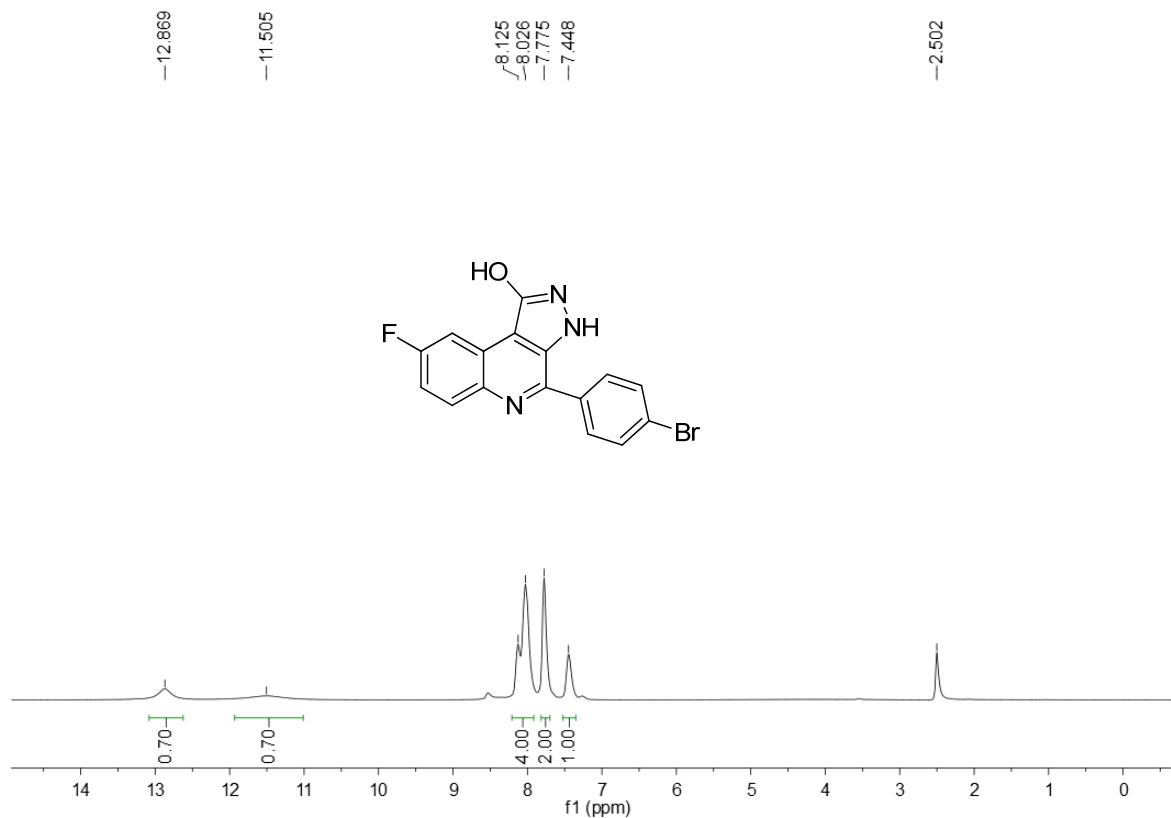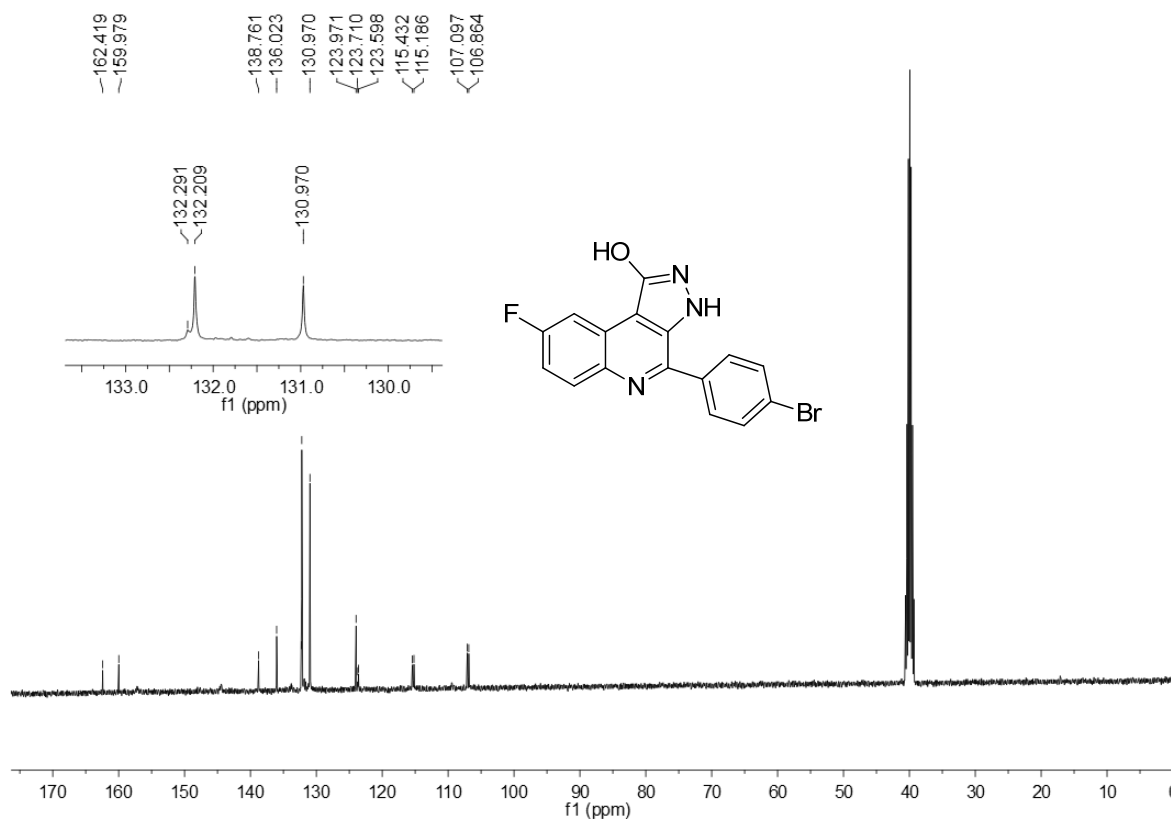

<sup>13</sup>C NMR Spectrum of Compound 3l

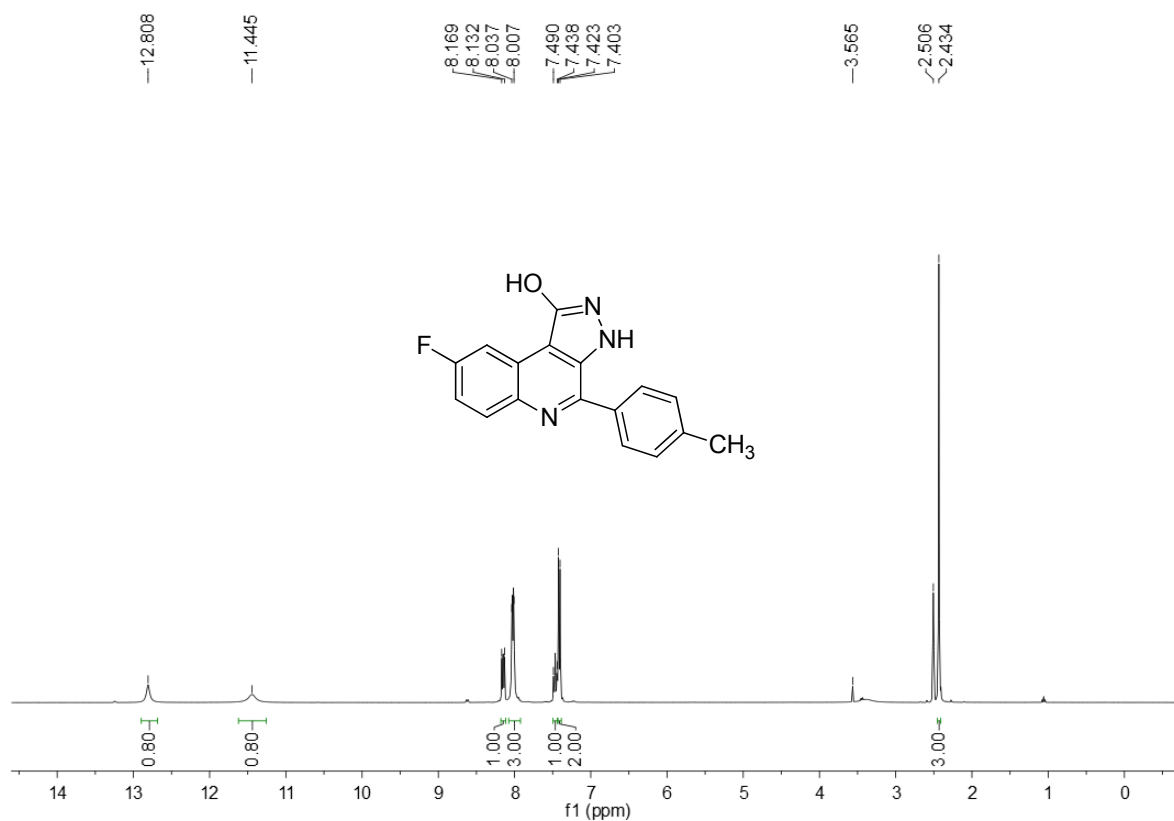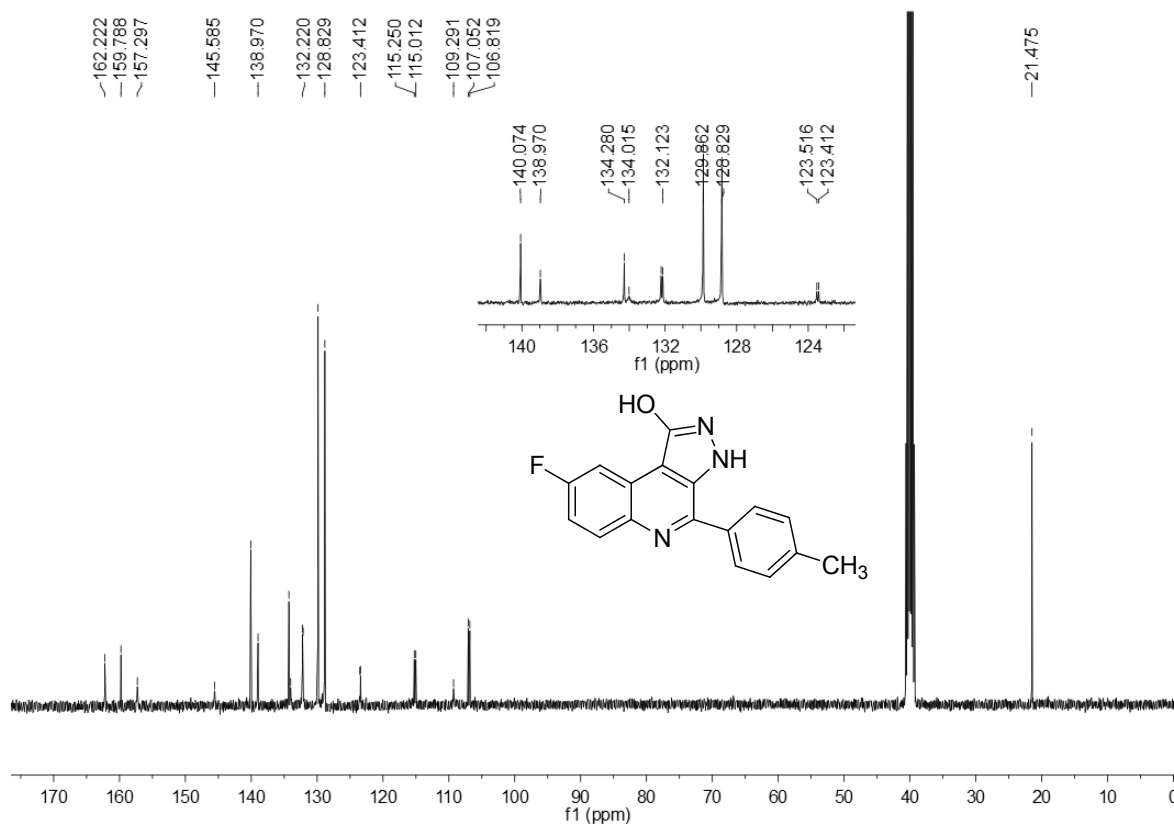

**<sup>13</sup>C NMR Spectrum of Compound 3m**

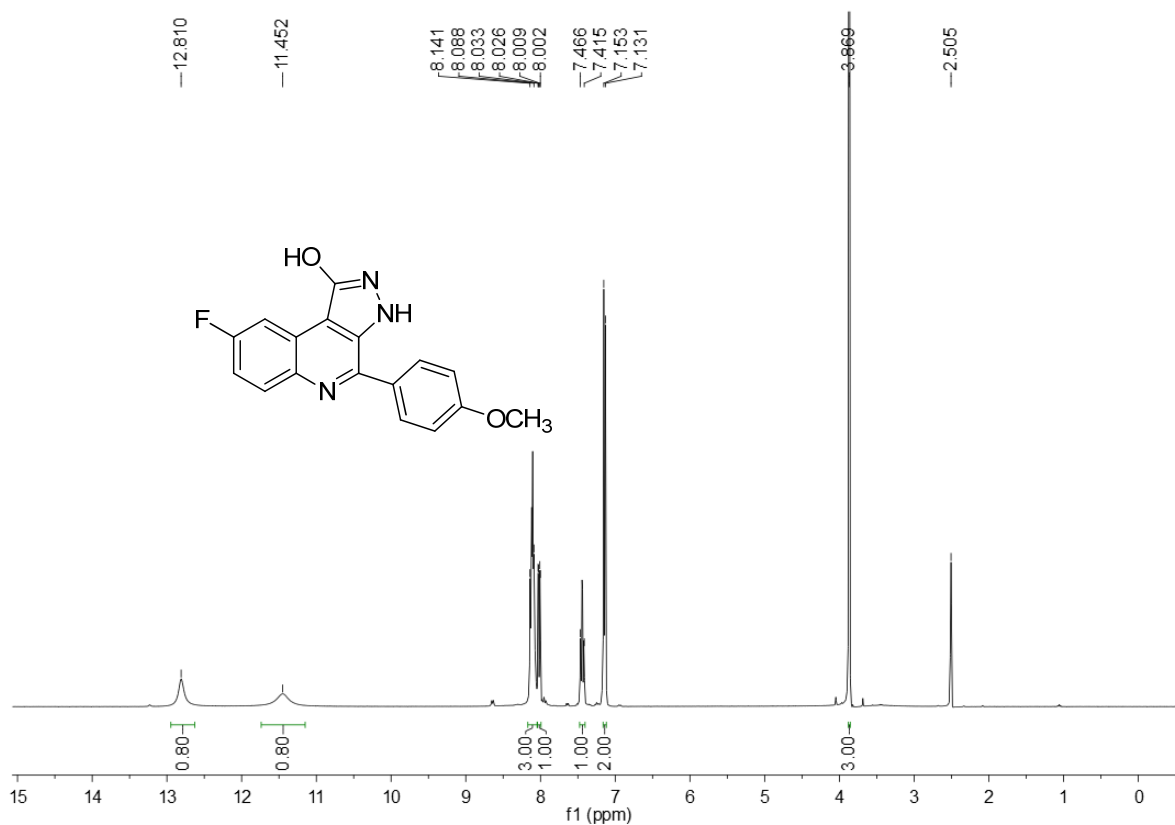

**<sup>1</sup>H NMR Spectrum of Compound 3n**

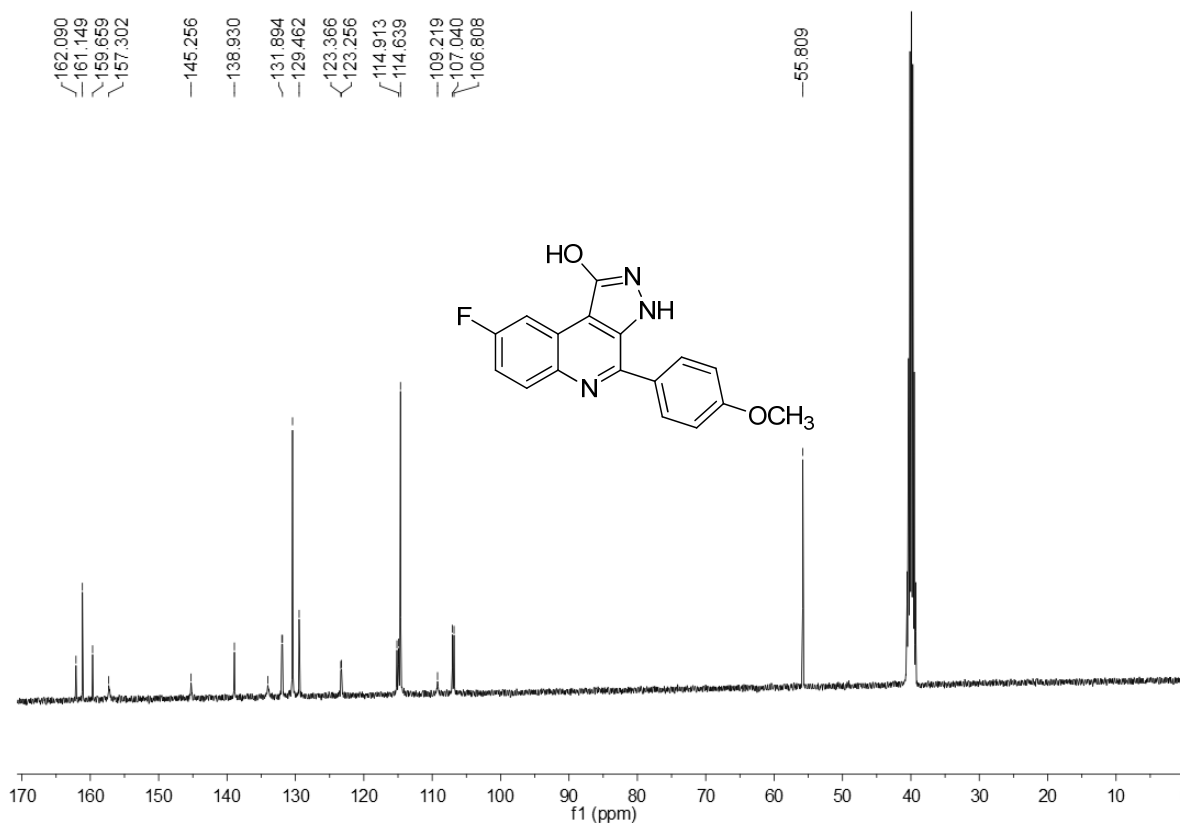

**<sup>13</sup>C NMR Spectrum of Compound 3n**

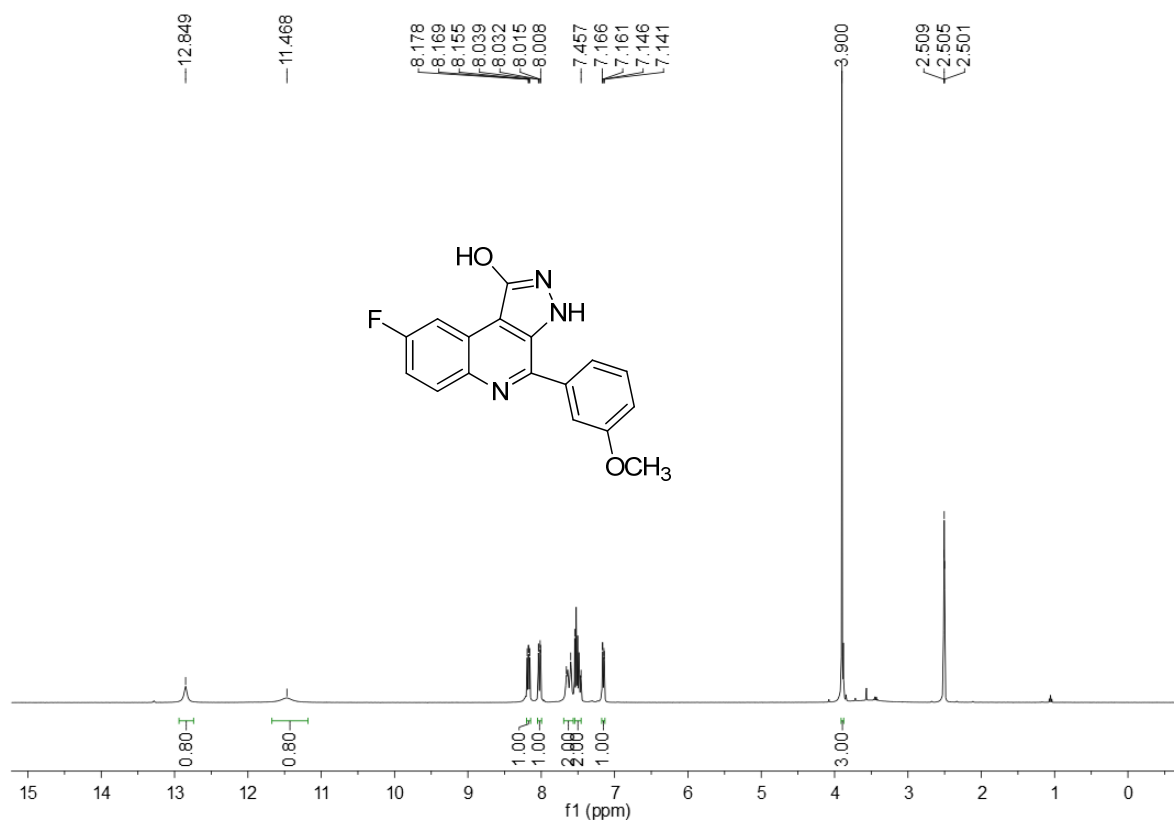

**<sup>1</sup>H NMR Spectrum of Compound 3o**

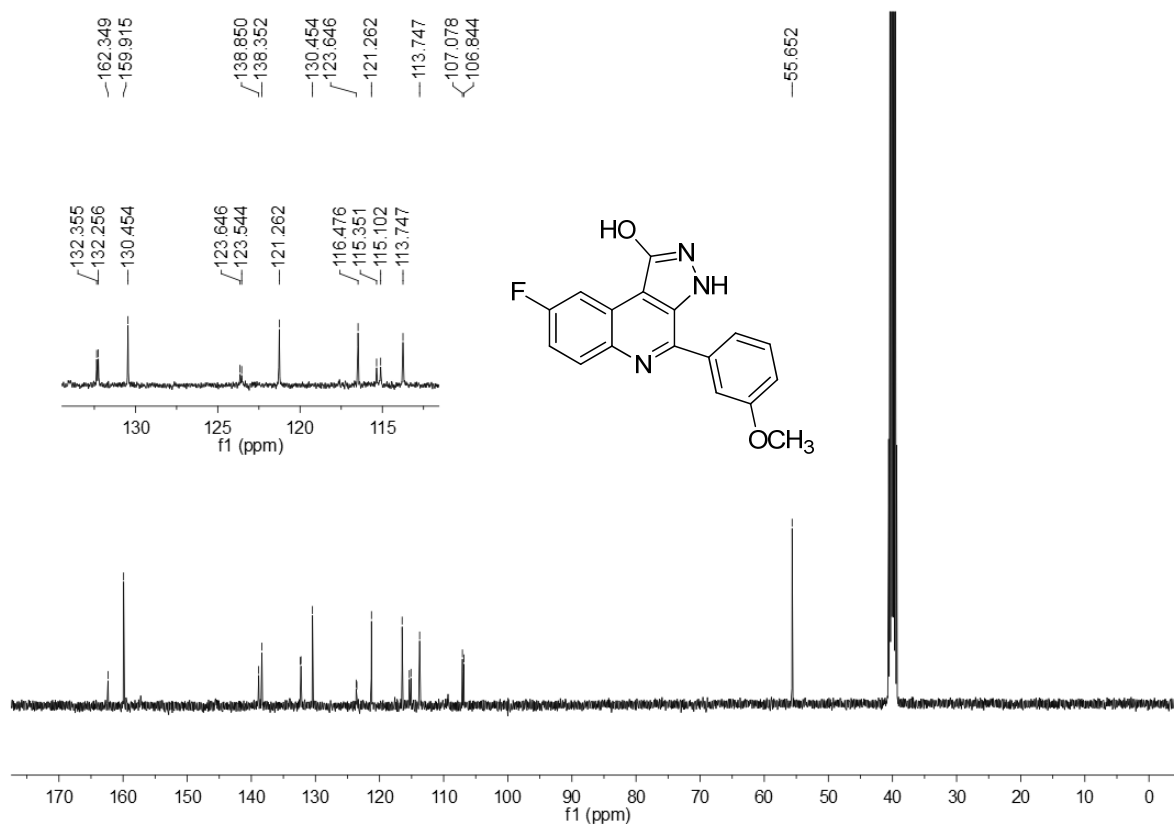

**<sup>13</sup>C NMR Spectrum of Compound 3o**



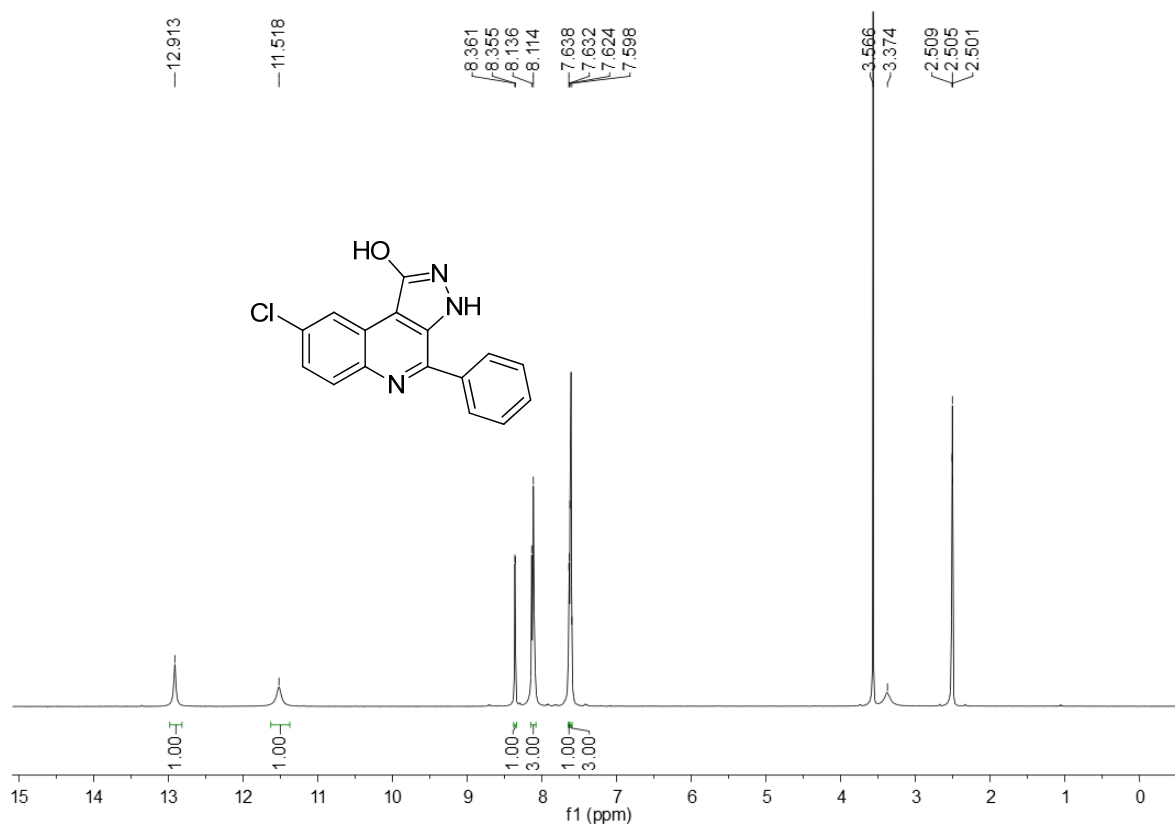

**<sup>1</sup>H NMR Spectrum of Compound 3p**

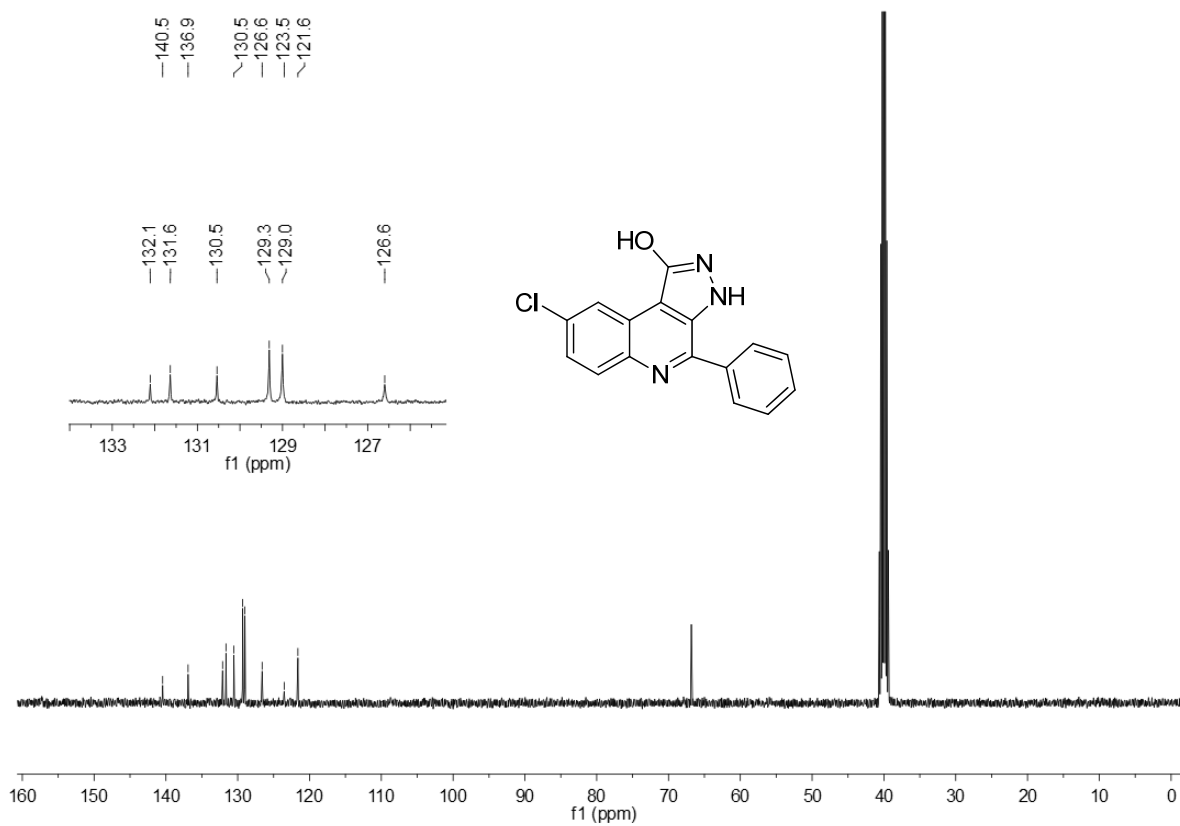

**<sup>13</sup>C NMR Spectrum of Compound 3p**

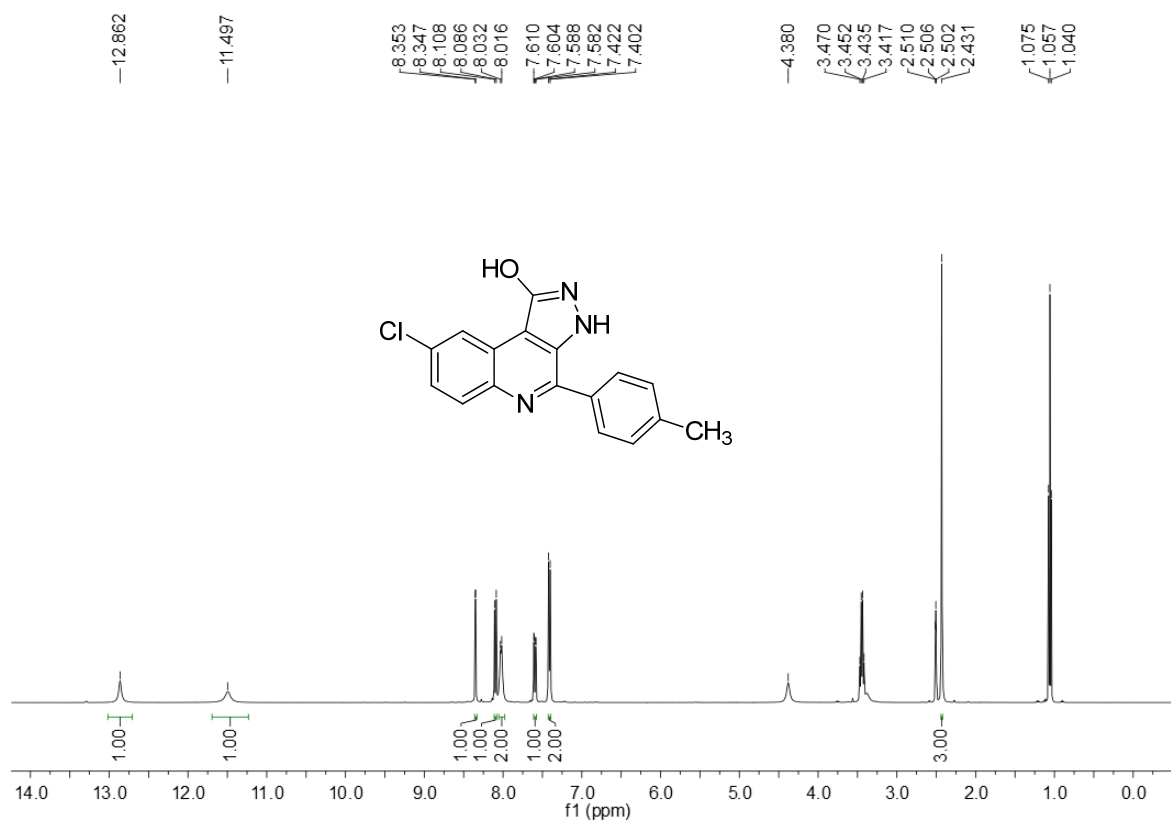

**<sup>1</sup>H NMR Spectrum of Compound 3q**

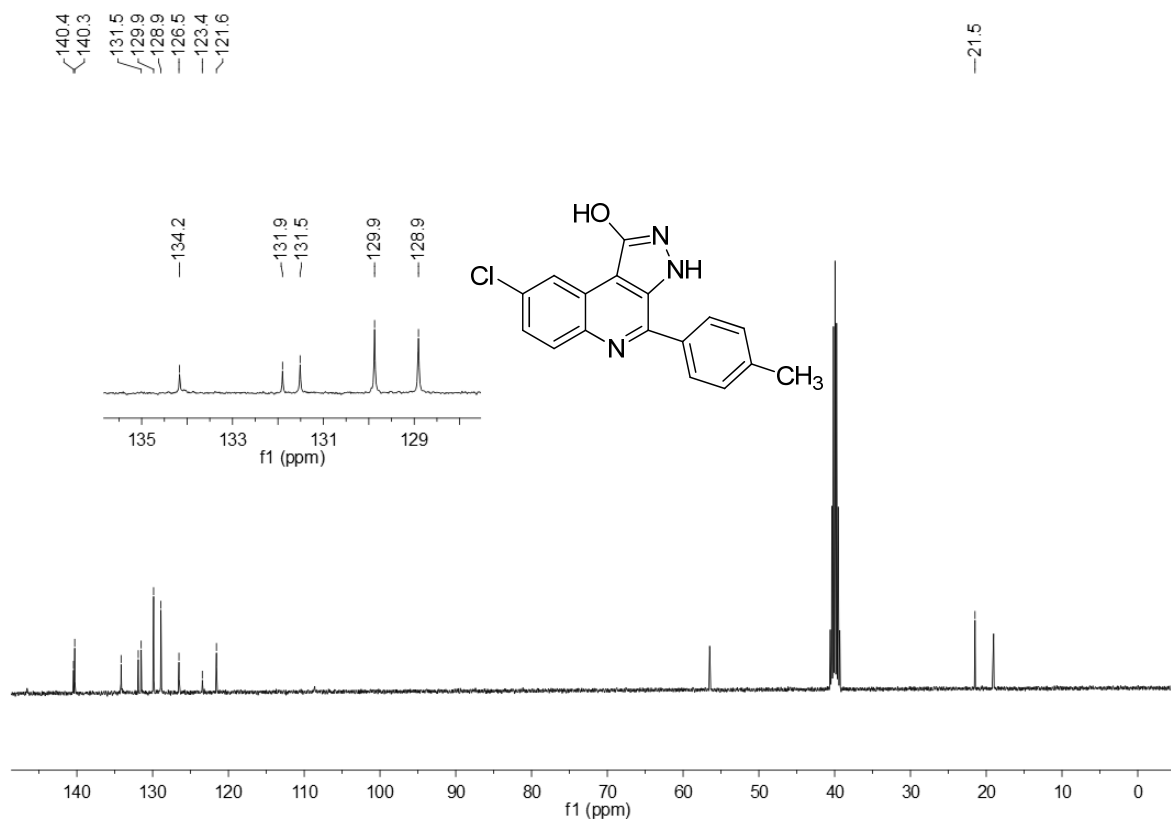

**<sup>13</sup>C NMR Spectrum of Compound 3q**

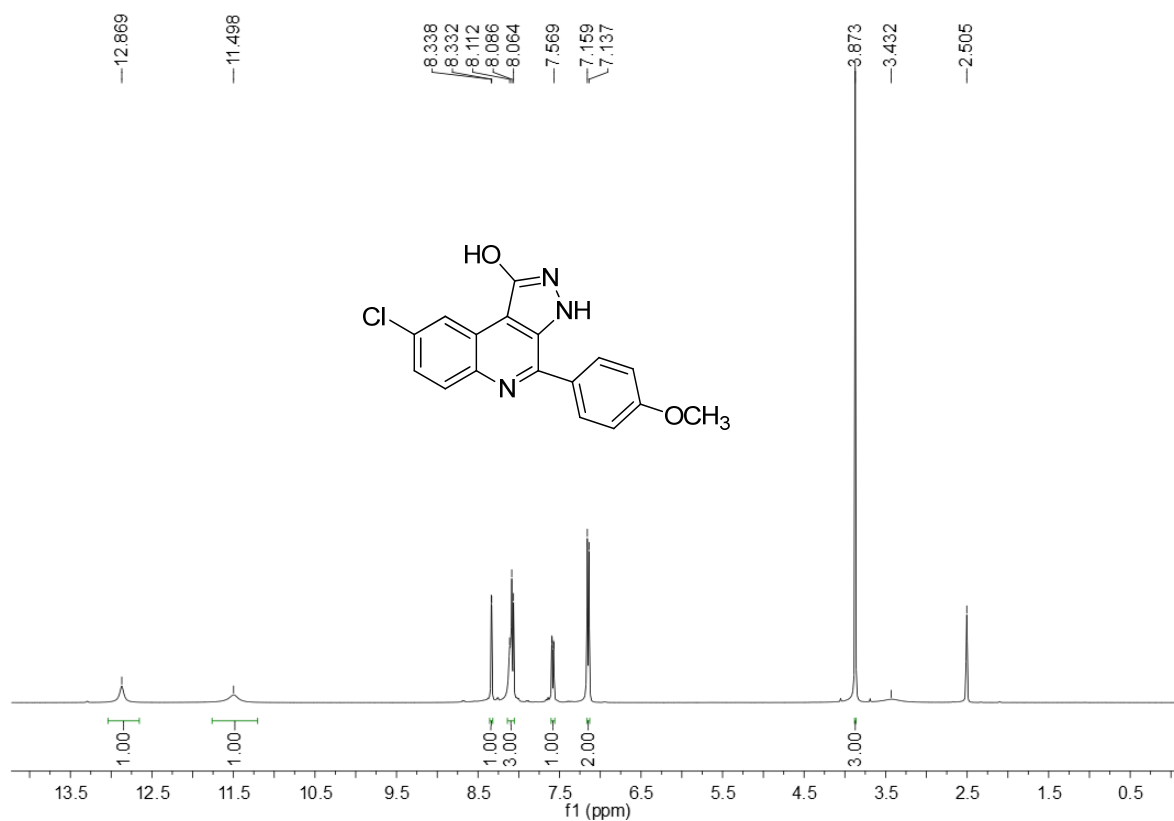

**<sup>1</sup>H NMR Spectrum of Compound 3r**

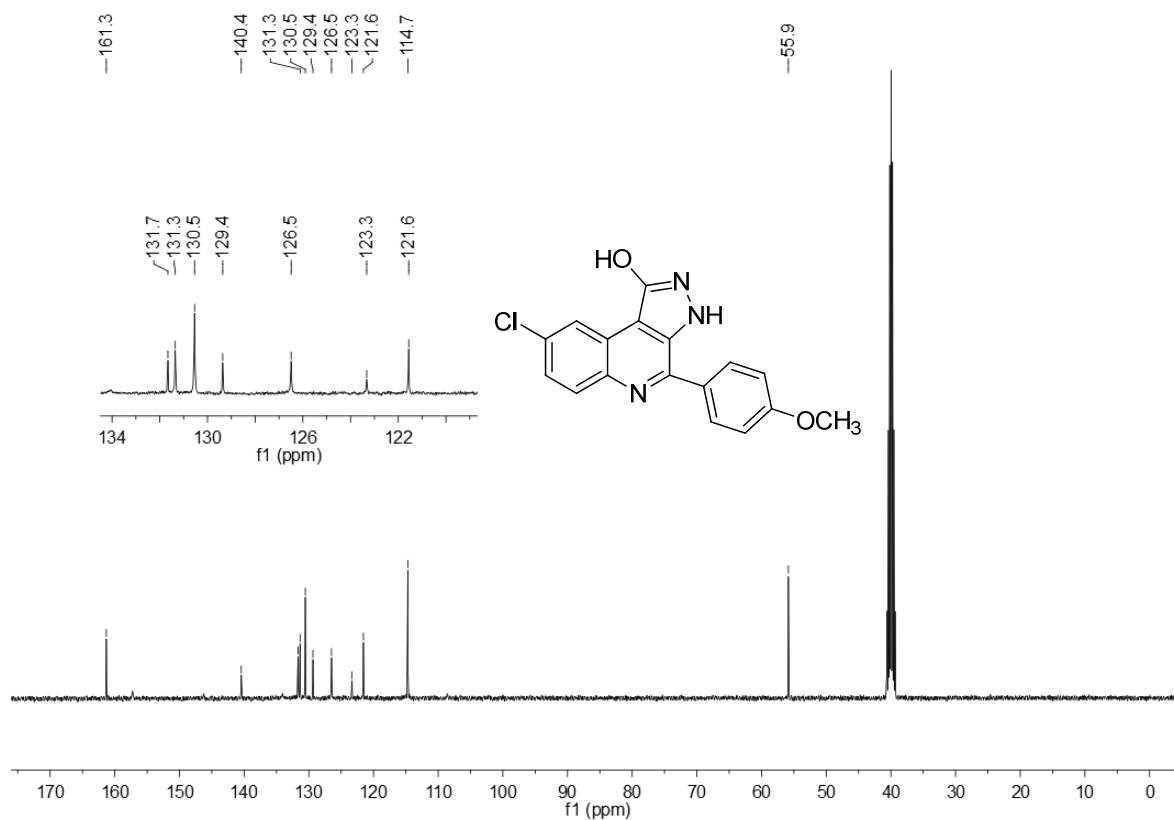

**<sup>13</sup>C NMR Spectrum of Compound 3r**

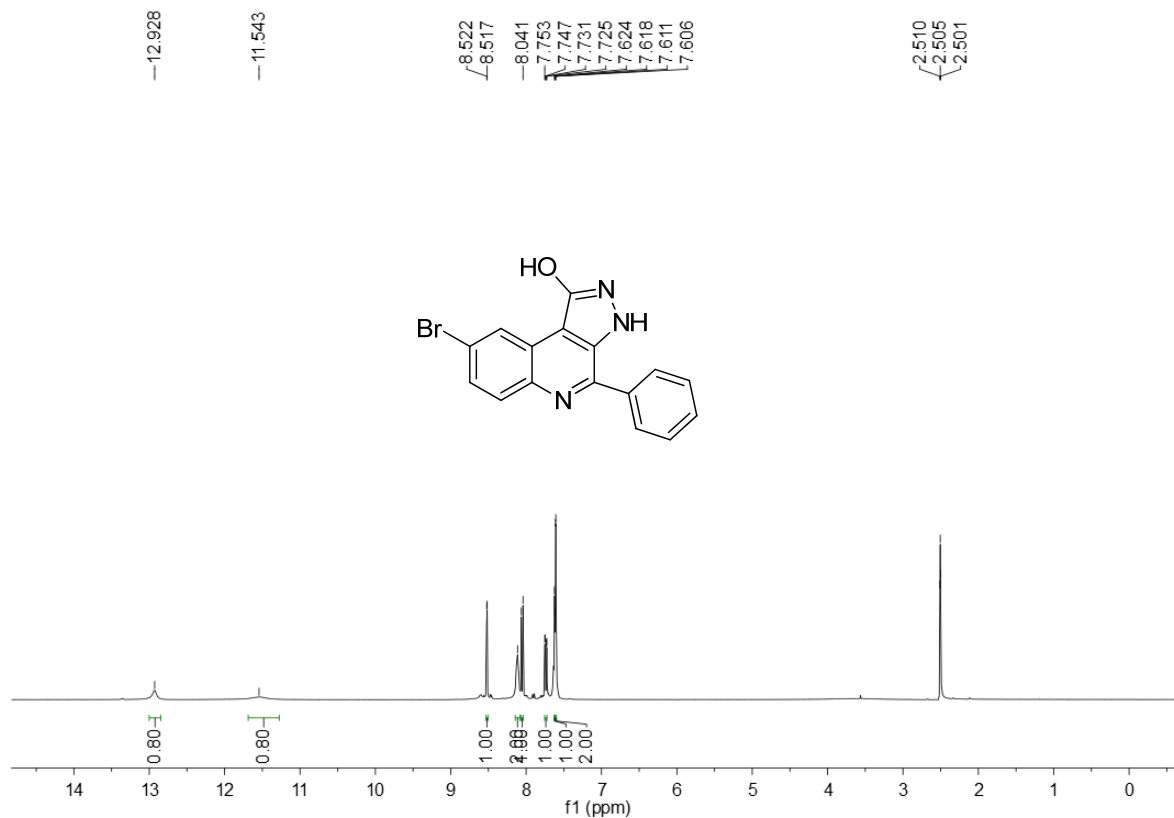

**<sup>1</sup>H NMR Spectrum of Compound 3s**

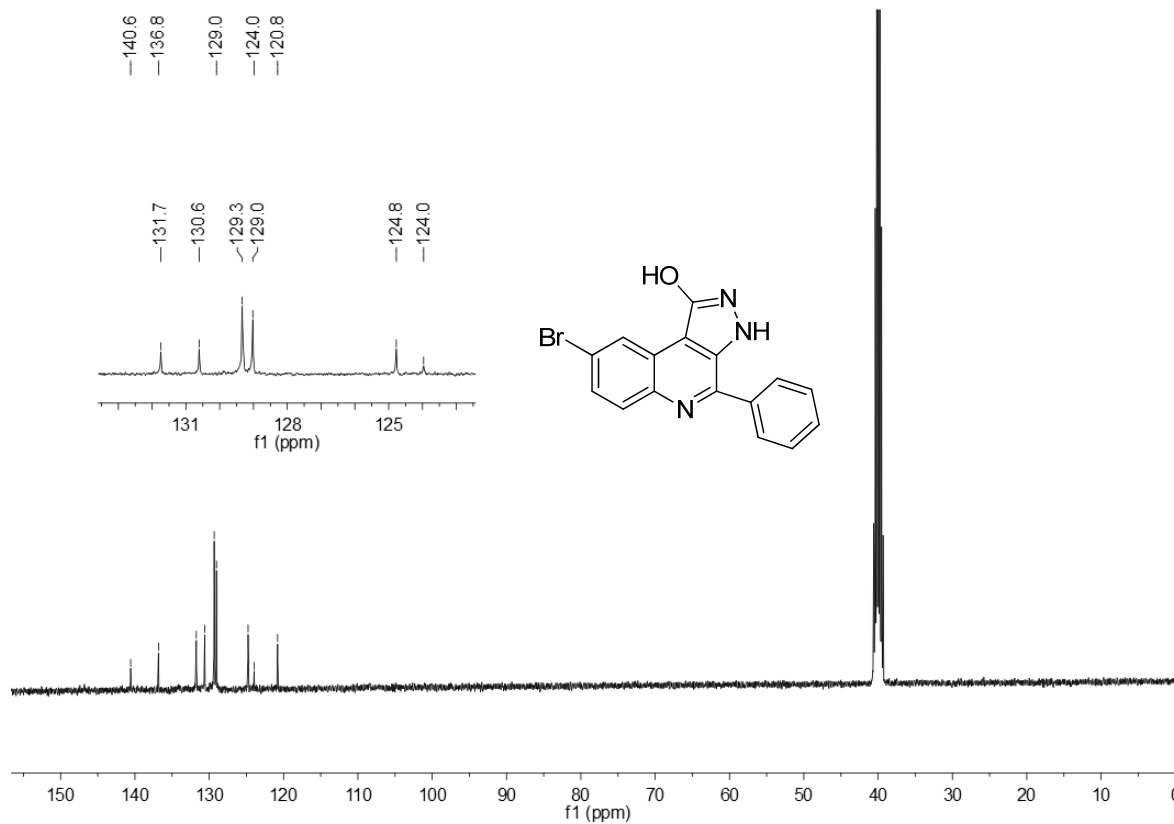

**<sup>13</sup>C NMR Spectrum of Compound 3s**

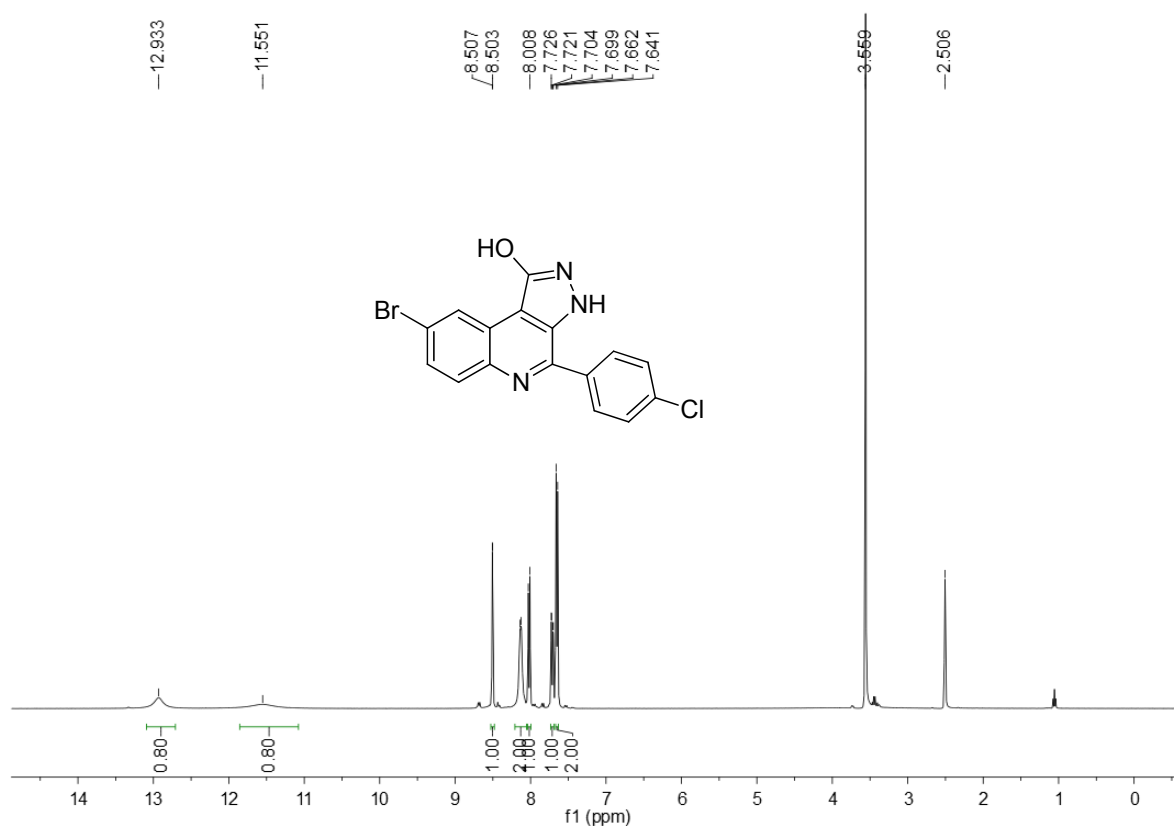

**<sup>1</sup>H NMR Spectrum of Compound 3t**

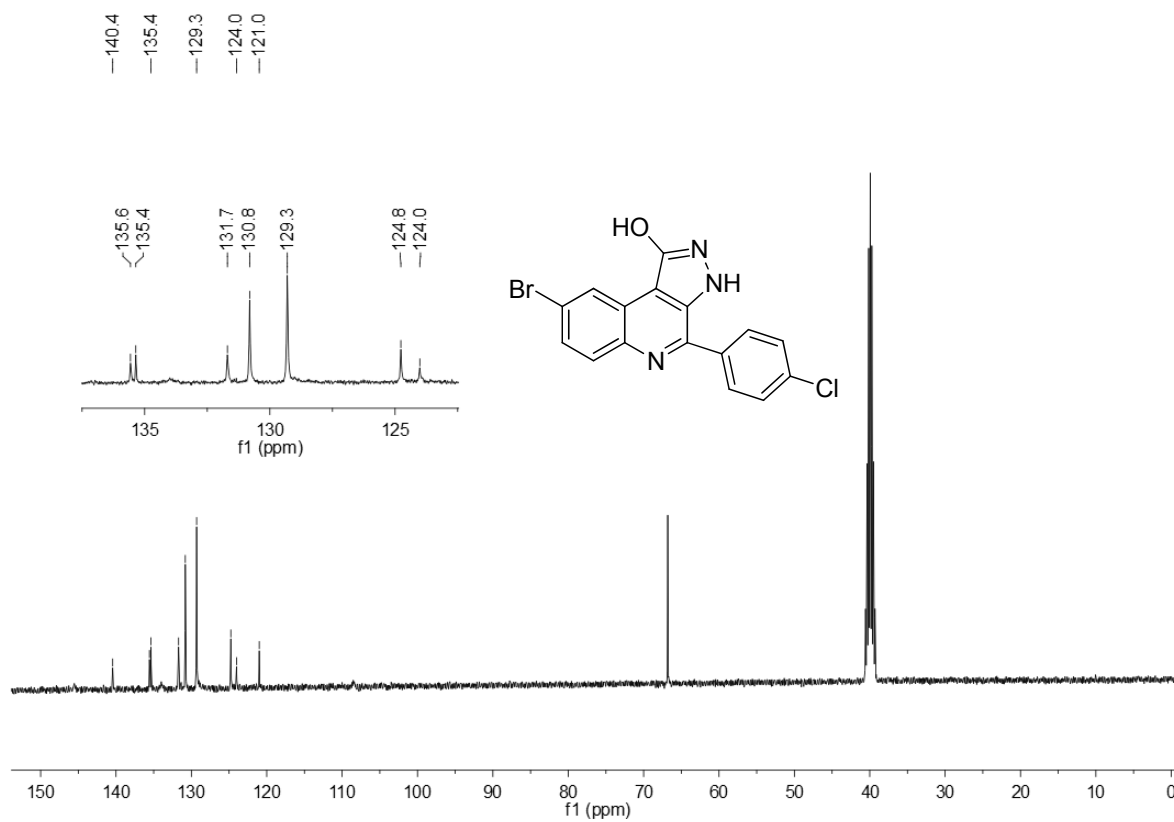

**<sup>13</sup>C NMR Spectrum of Compound 3t**

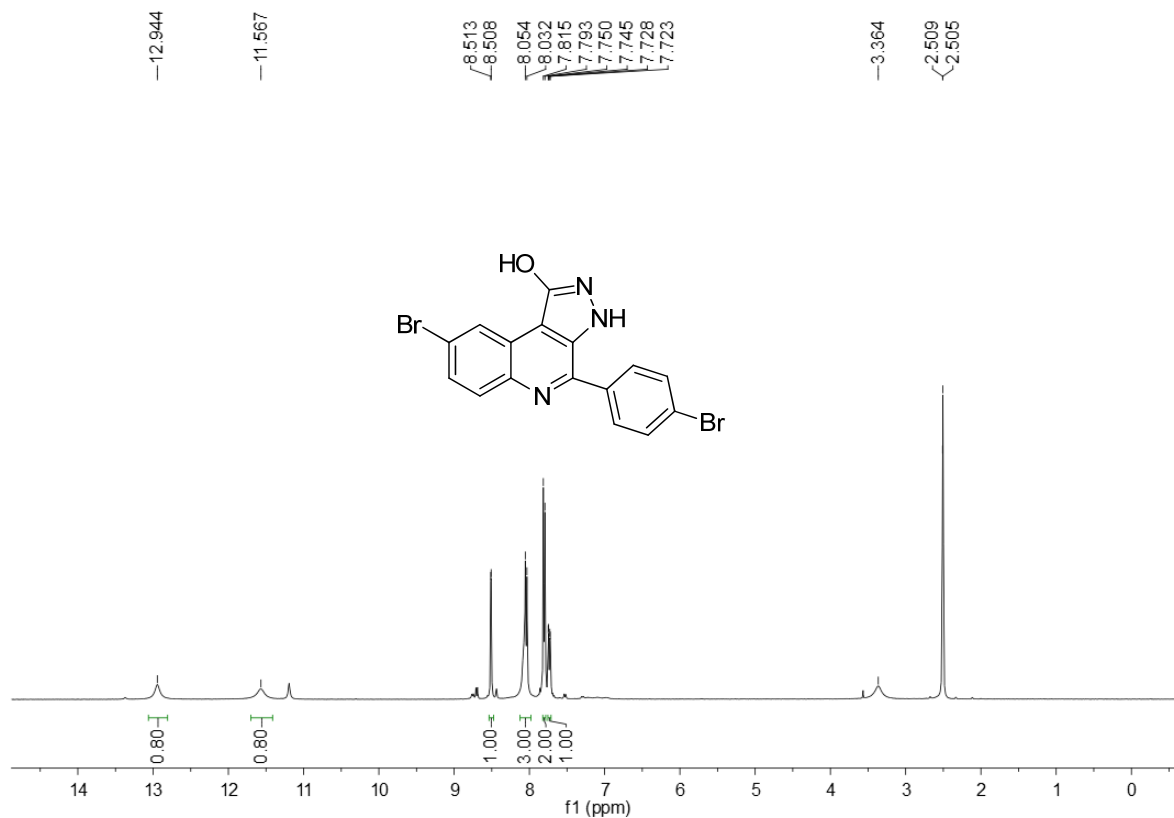

**<sup>1</sup>H NMR Spectrum of Compound 3u**

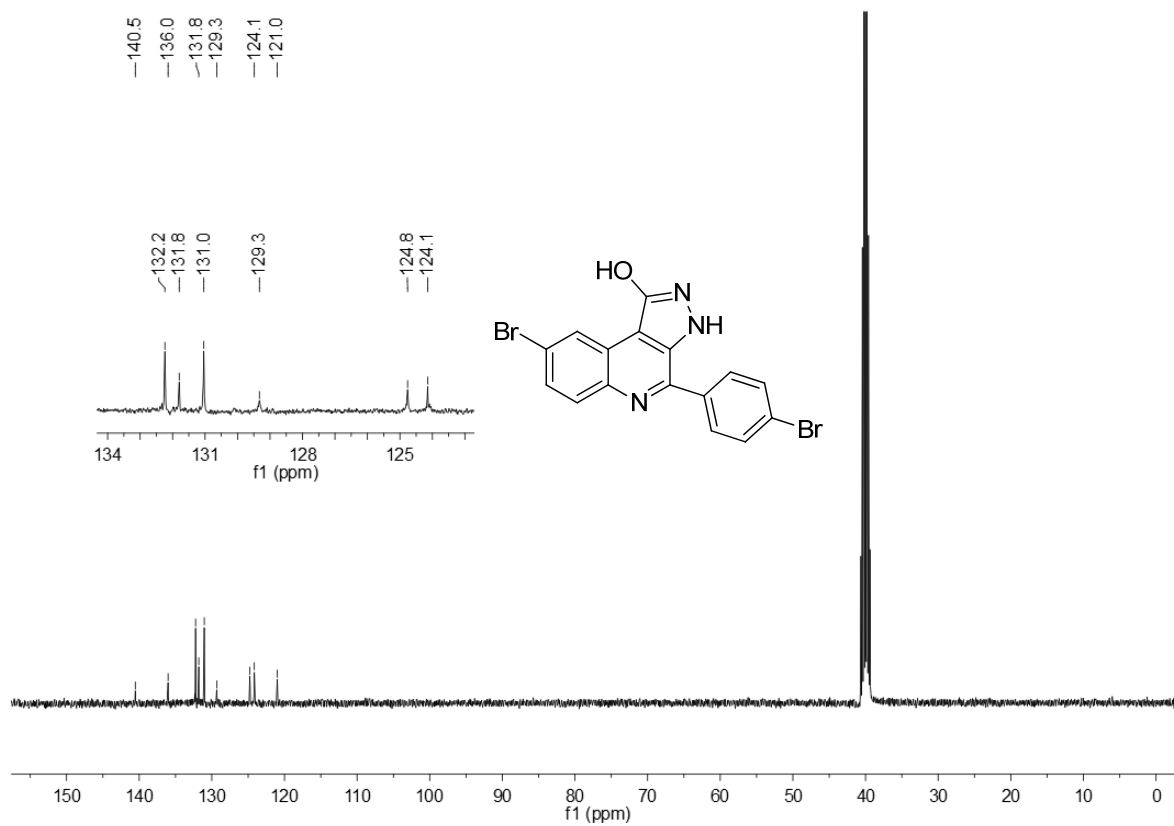

**<sup>13</sup>C NMR Spectrum of Compound 3u**

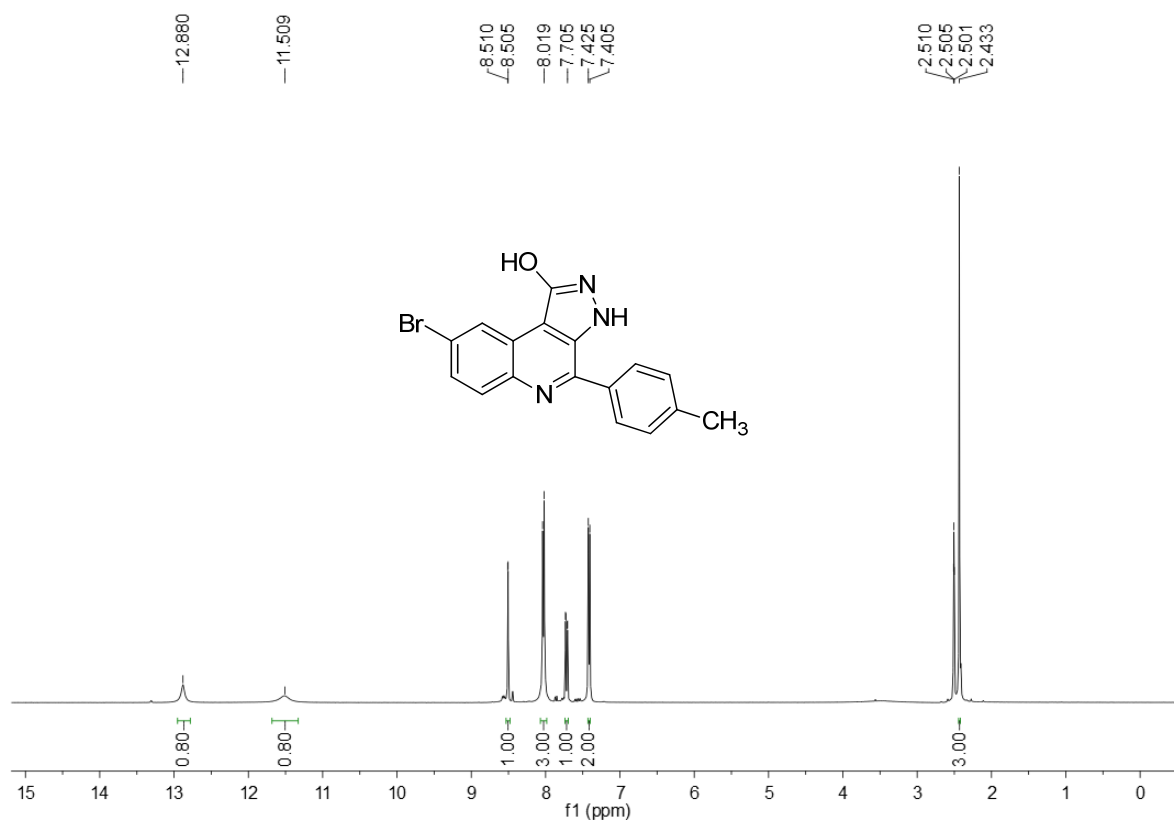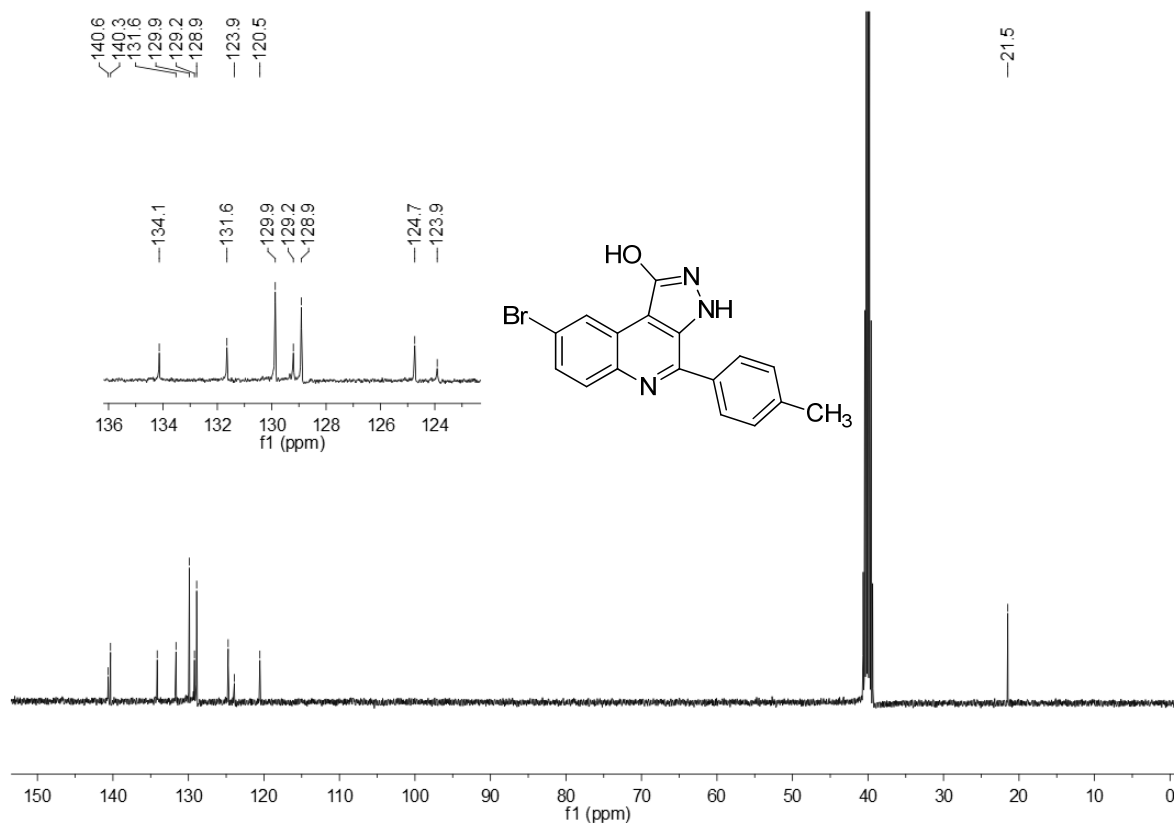

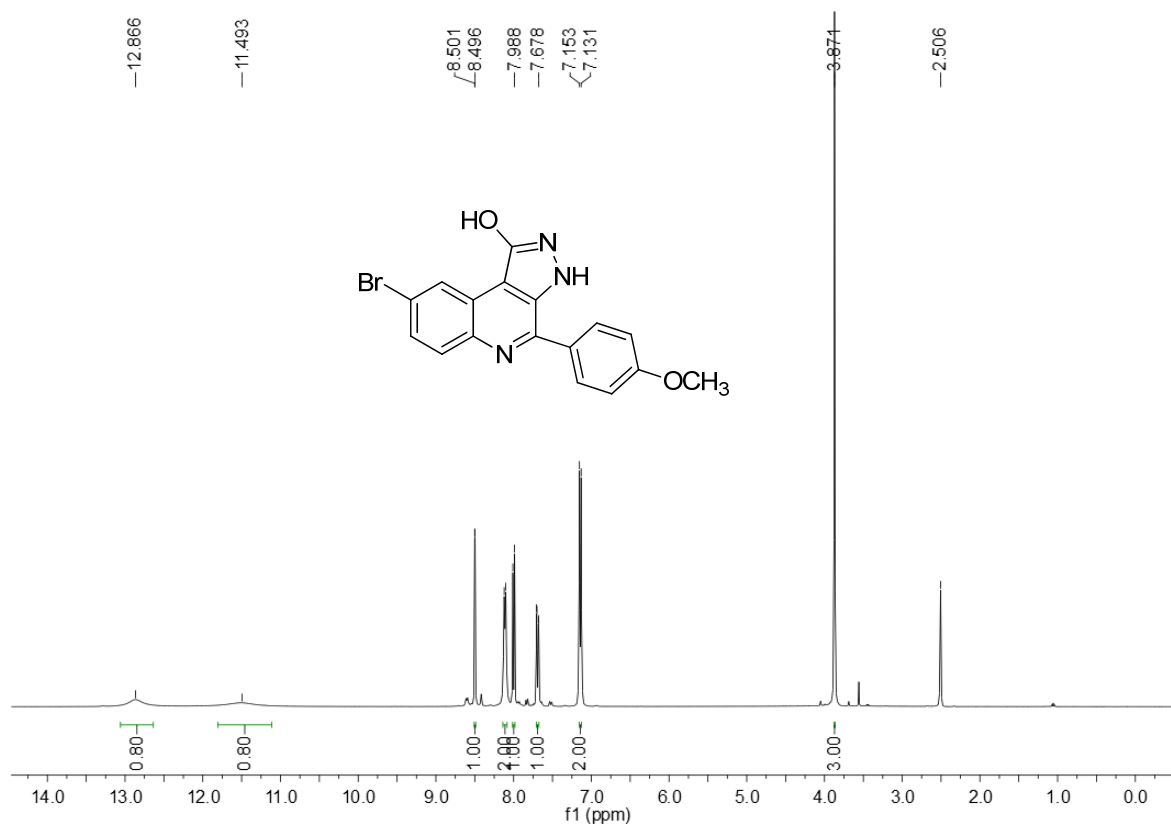

**<sup>1</sup>H NMR Spectrum of Compound 3w**

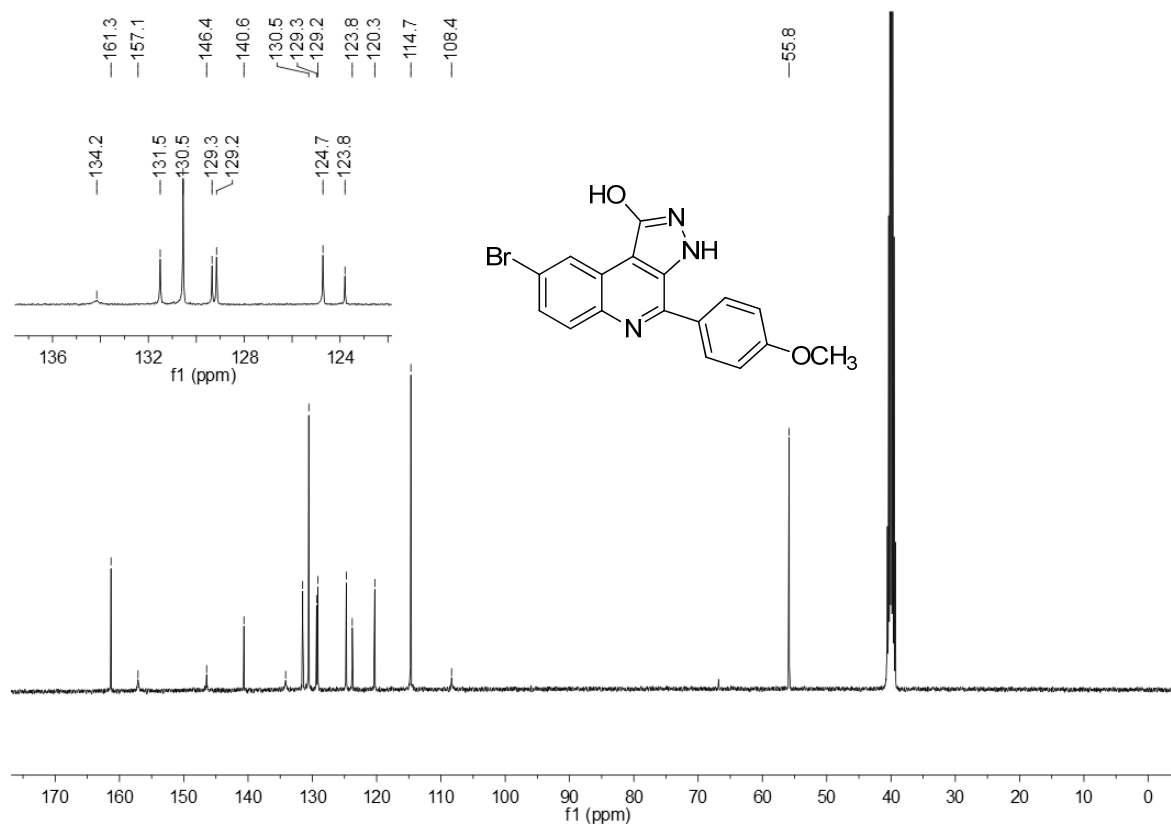

**<sup>13</sup>C NMR Spectrum of Compound 3w**



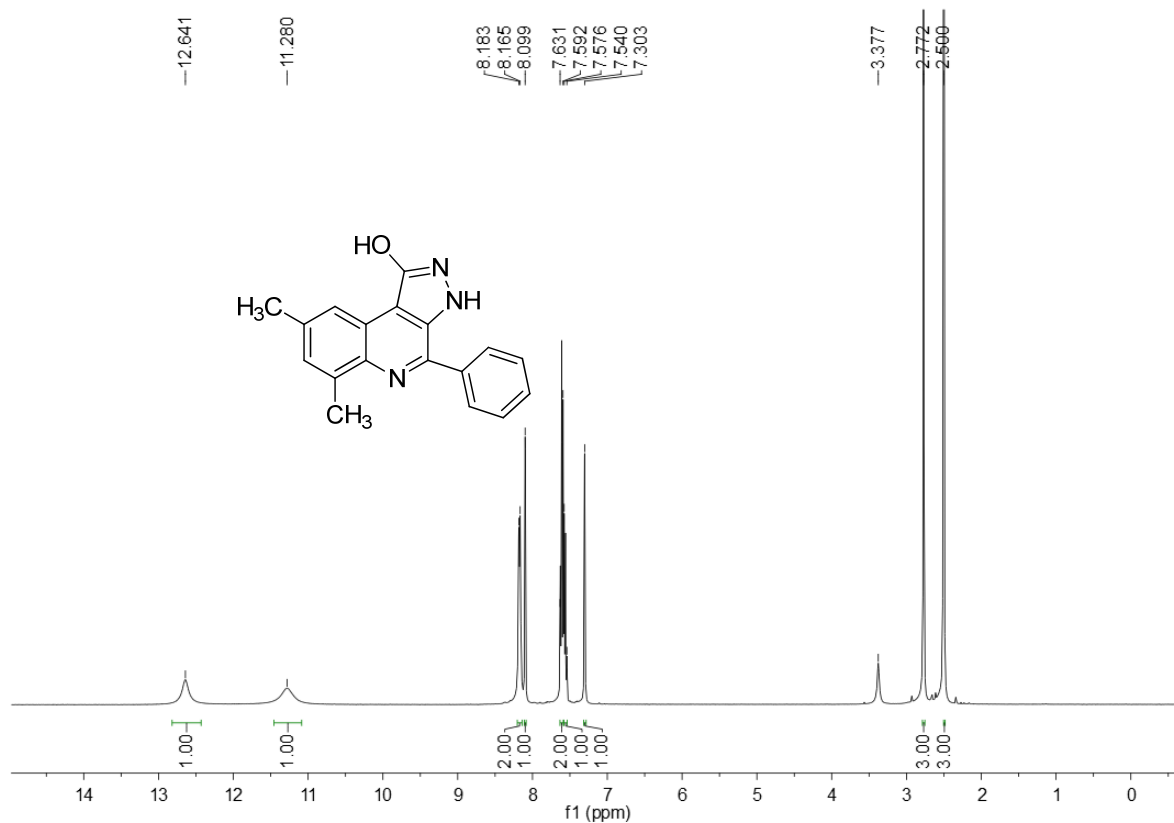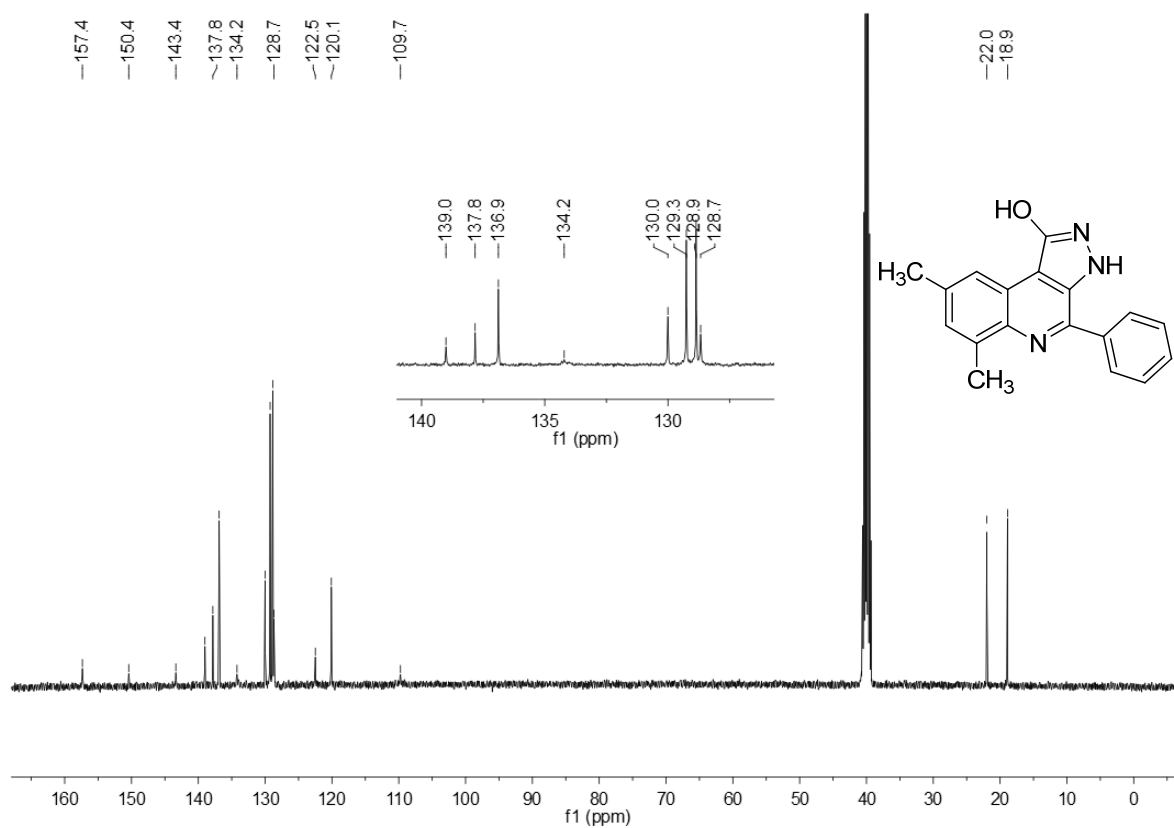

**<sup>13</sup>C NMR Spectrum of Compound 3x**

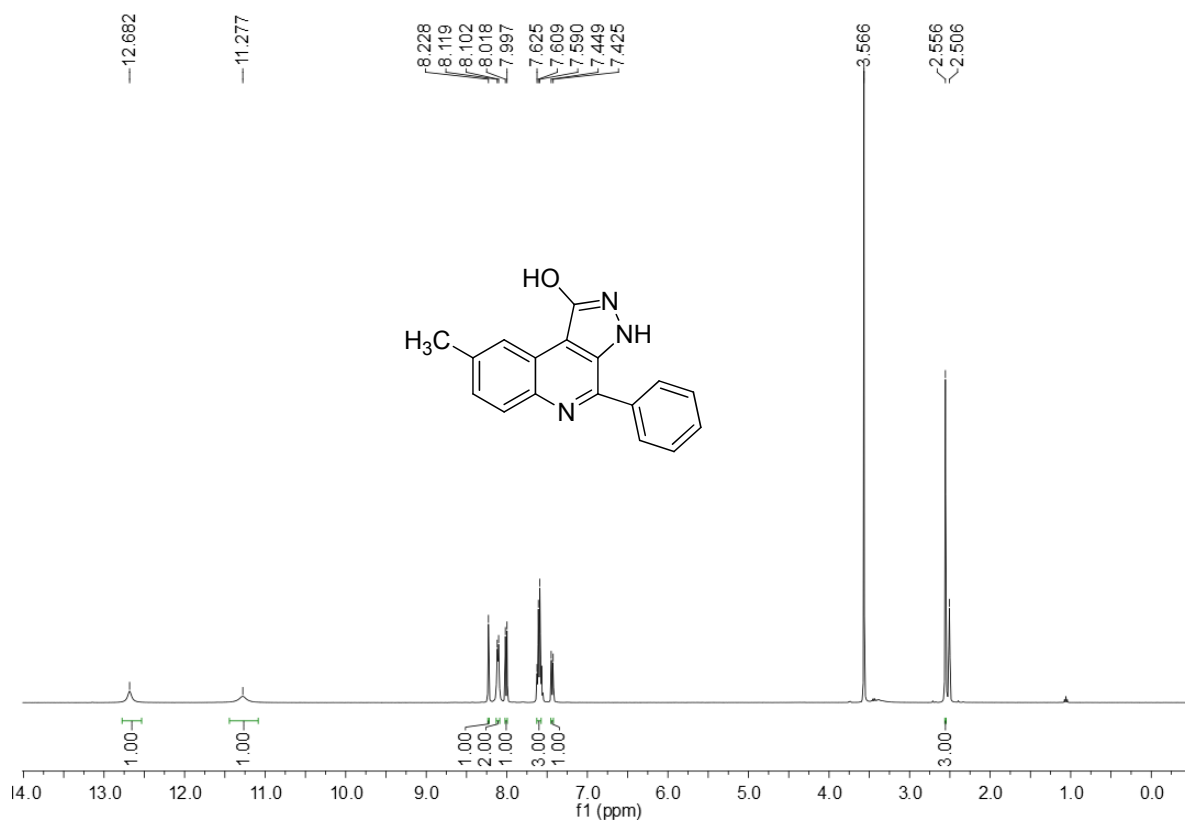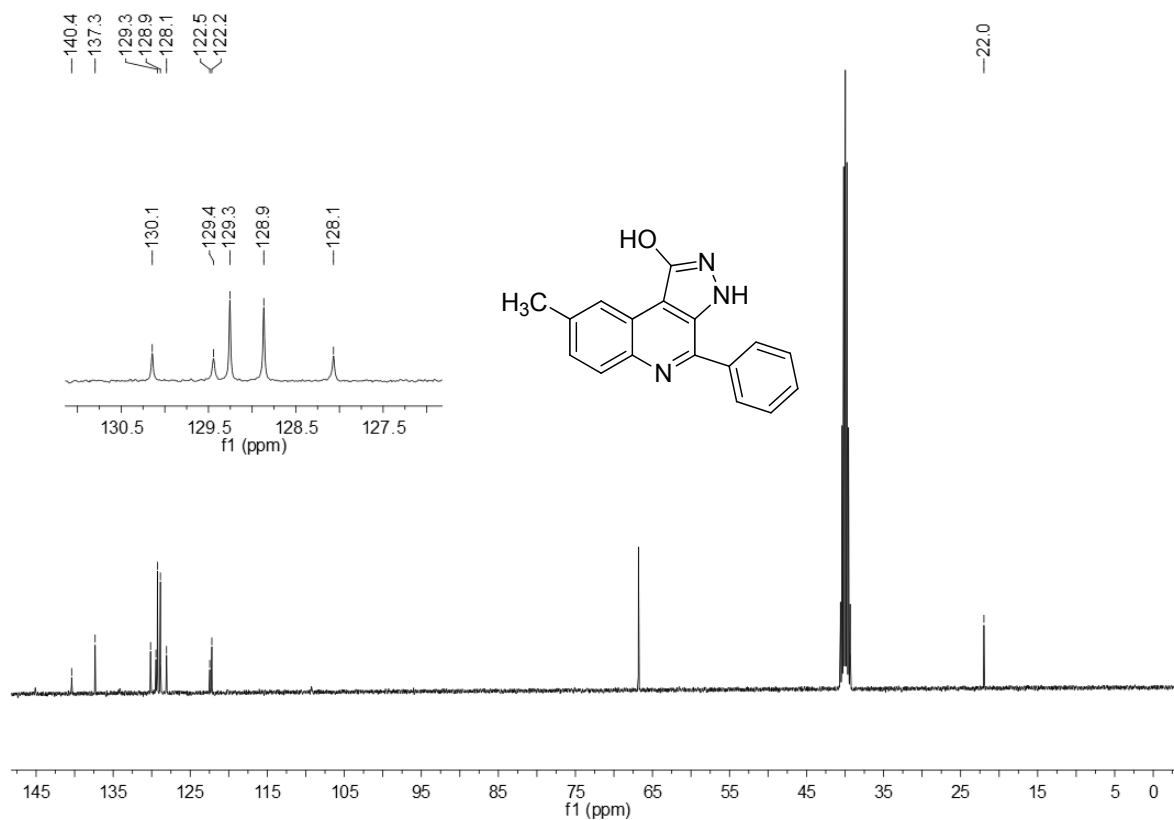

**<sup>13</sup>C NMR Spectrum of Compound 3y**

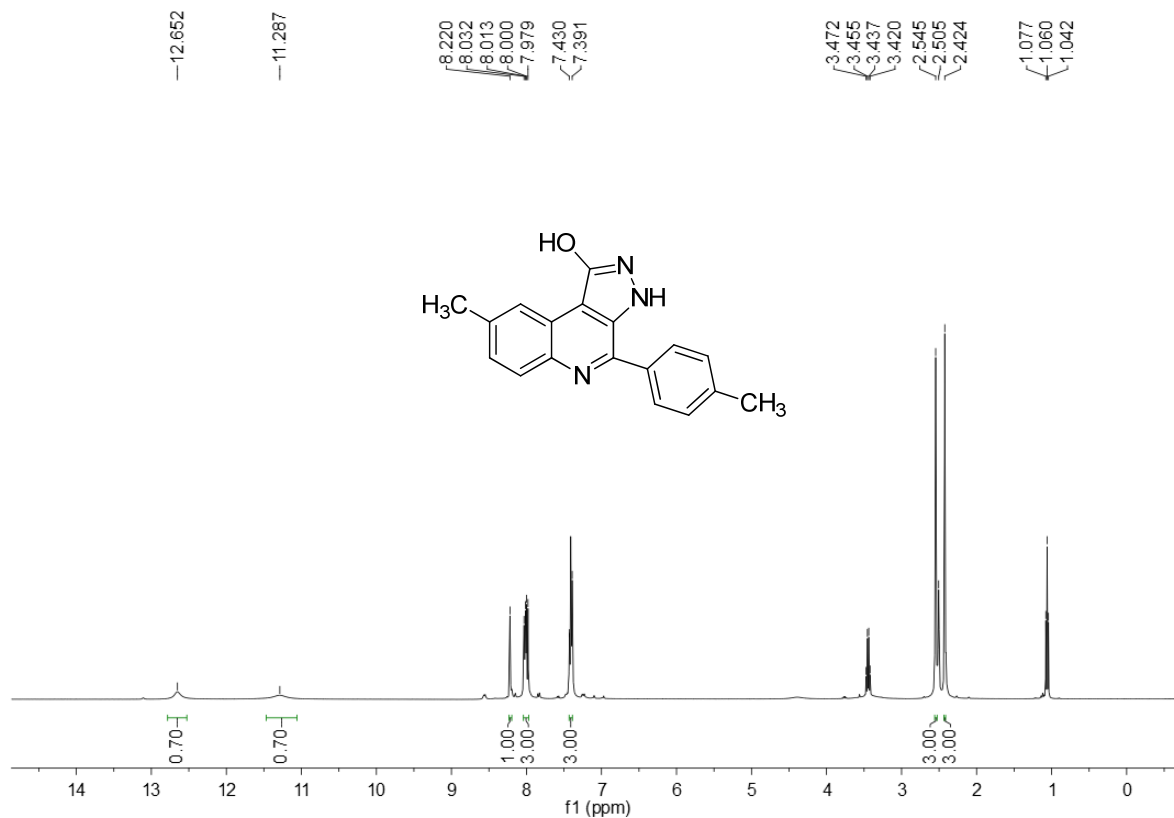

**<sup>1</sup>H NMR Spectrum of Compound 3z**

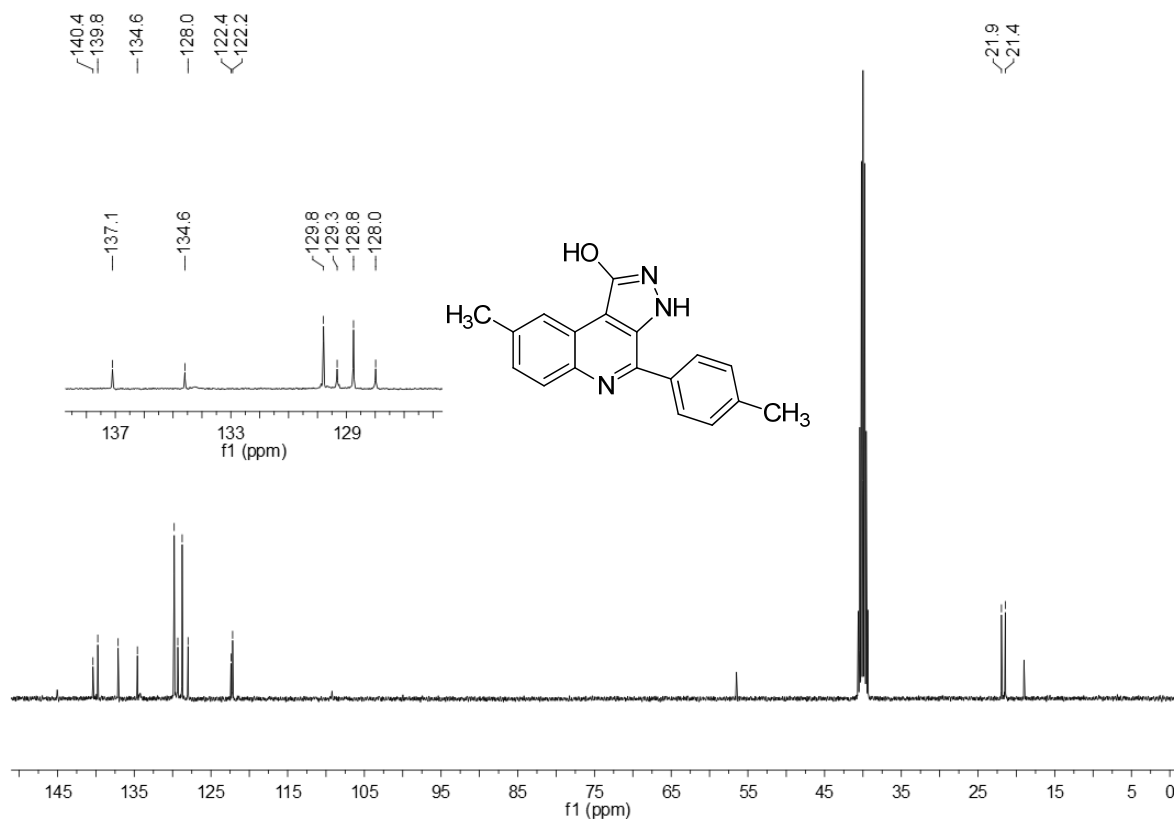

**<sup>13</sup>C NMR Spectrum of Compound 3z**

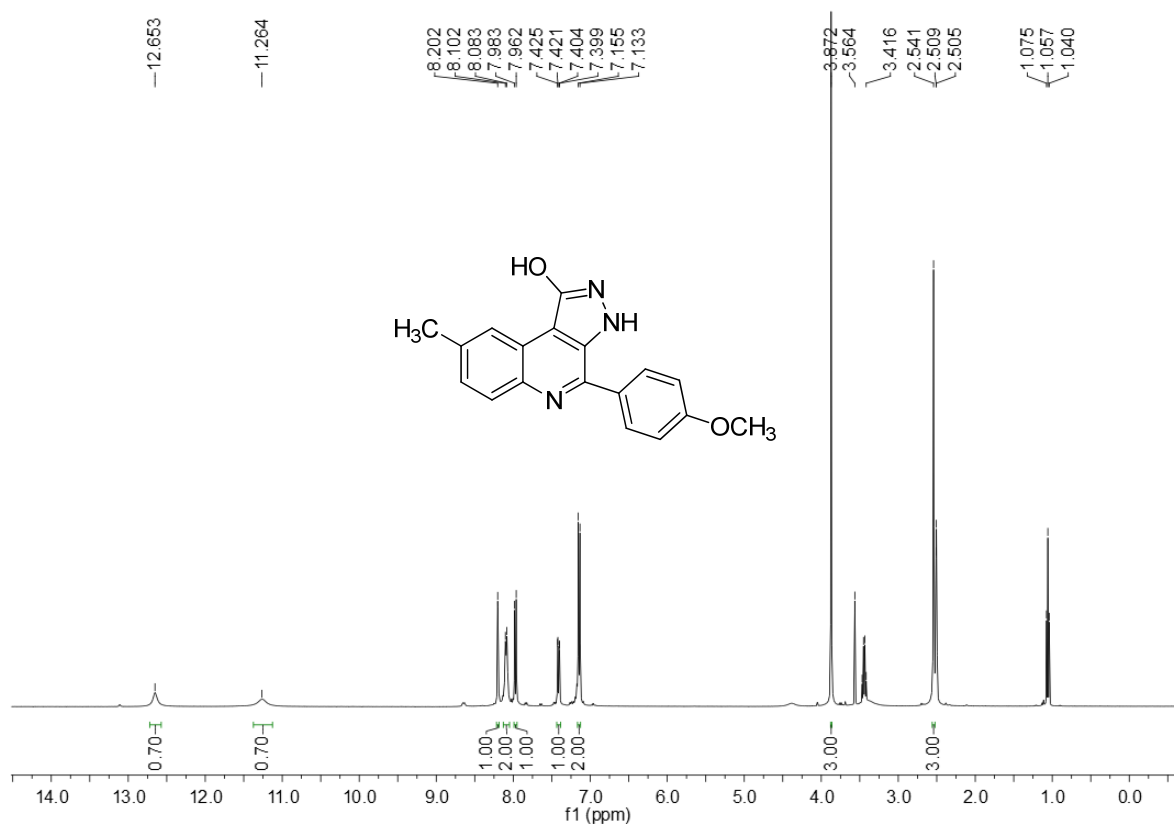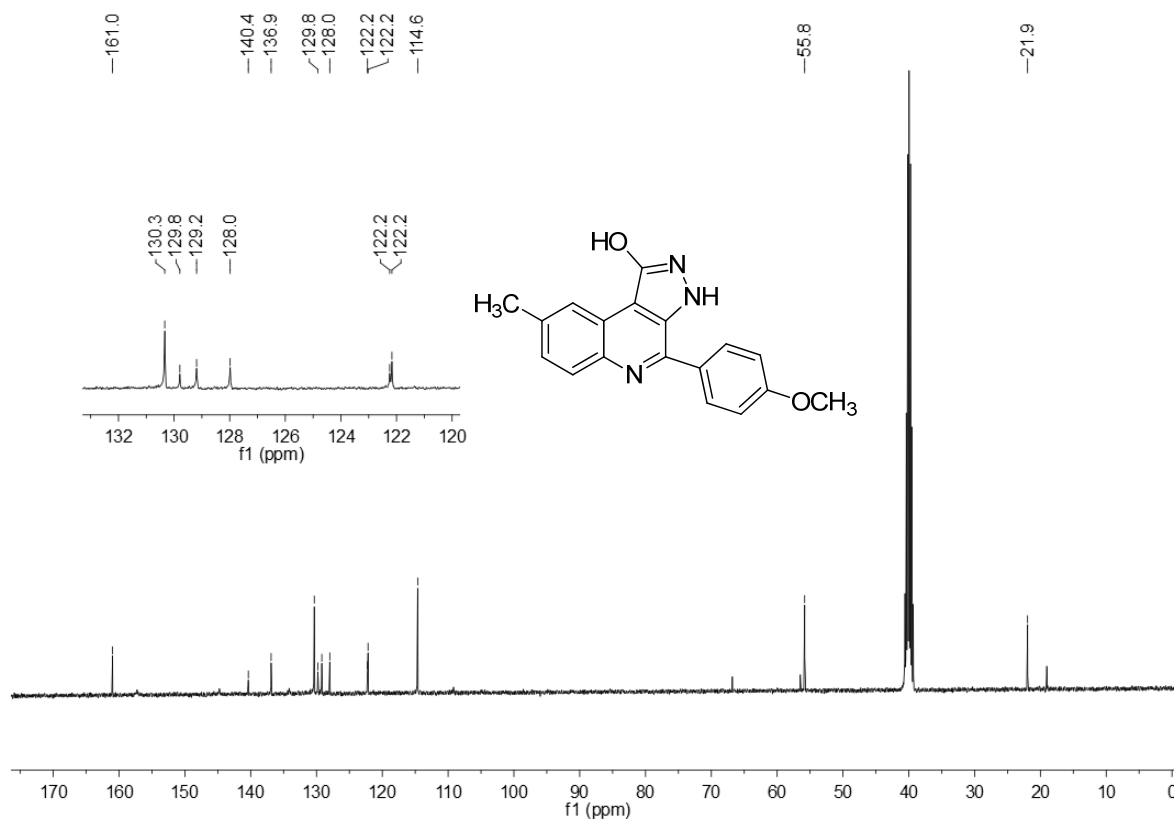

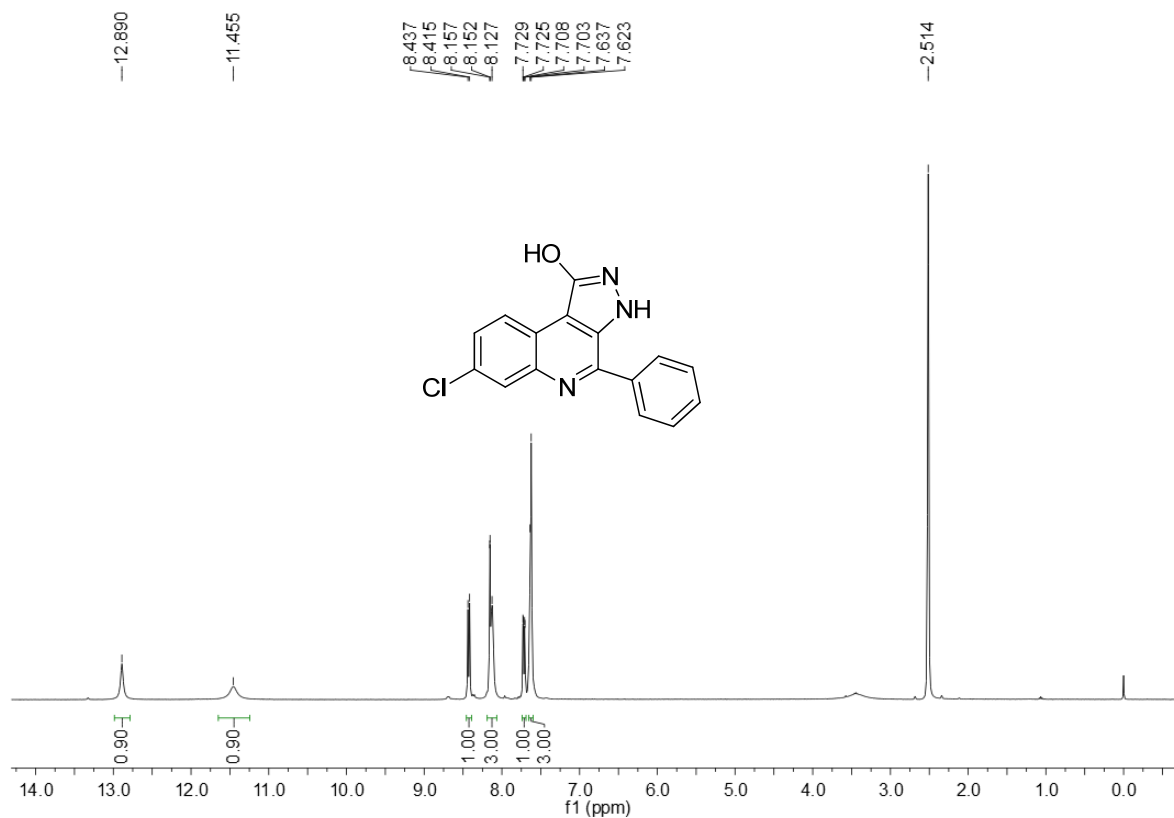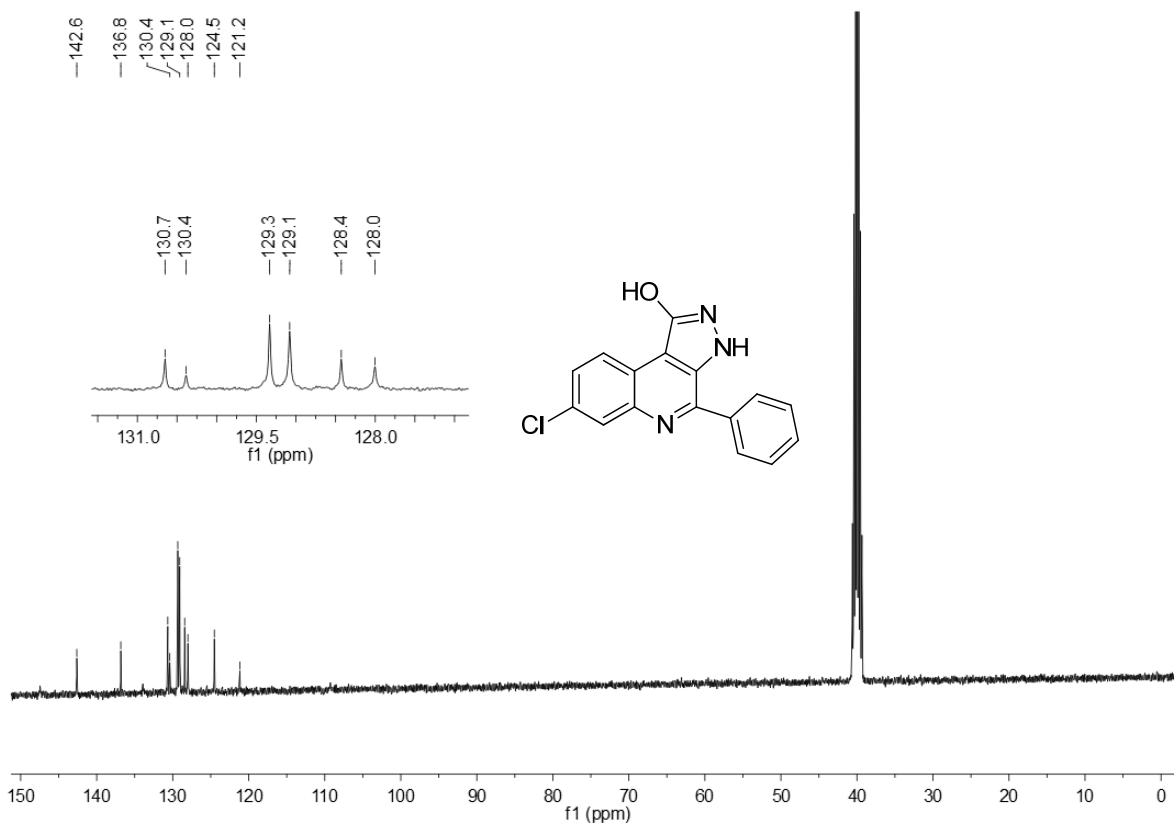

**<sup>13</sup>C NMR Spectrum of Compound 3bb**

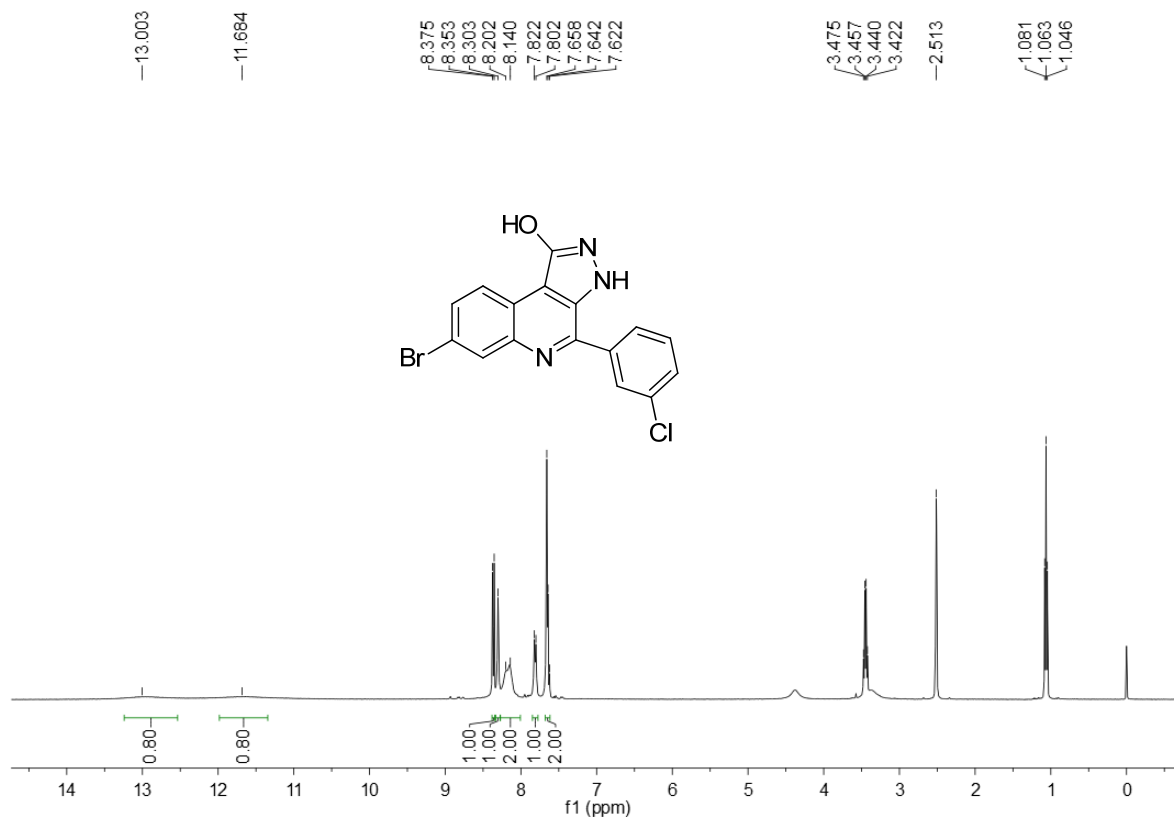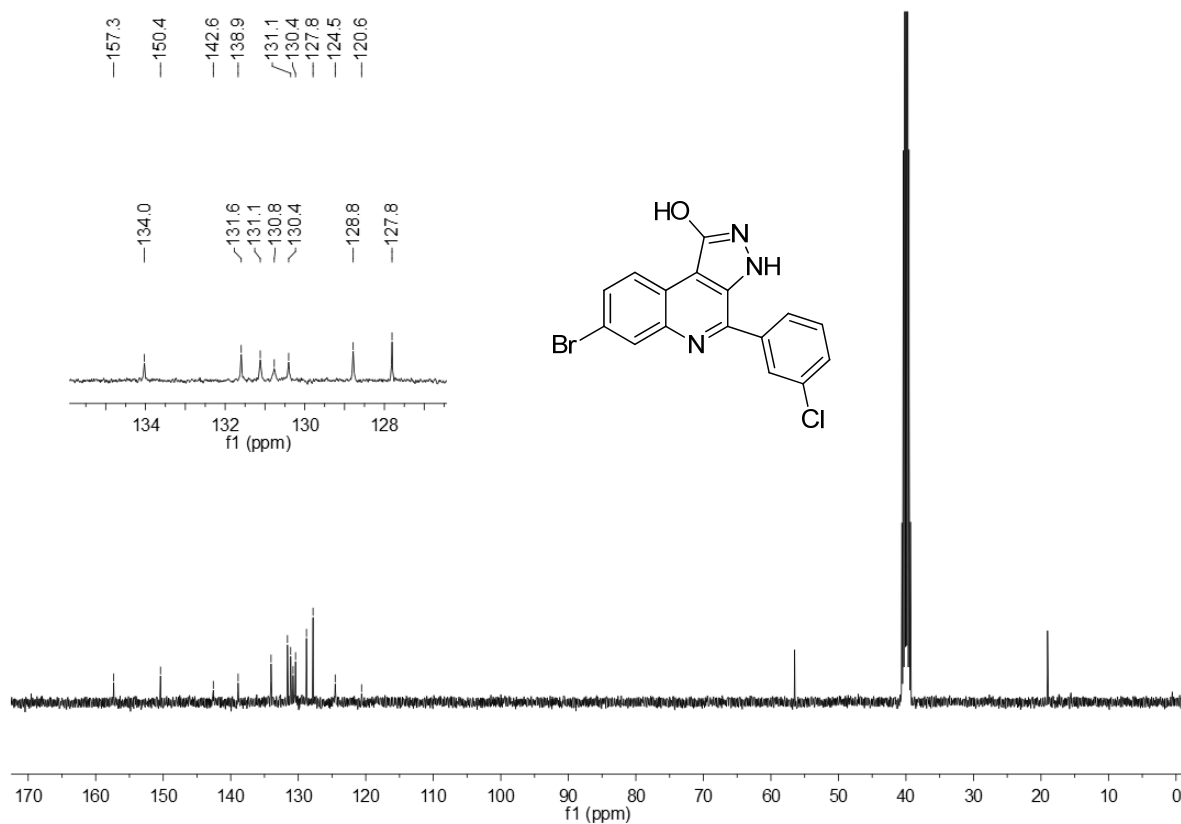

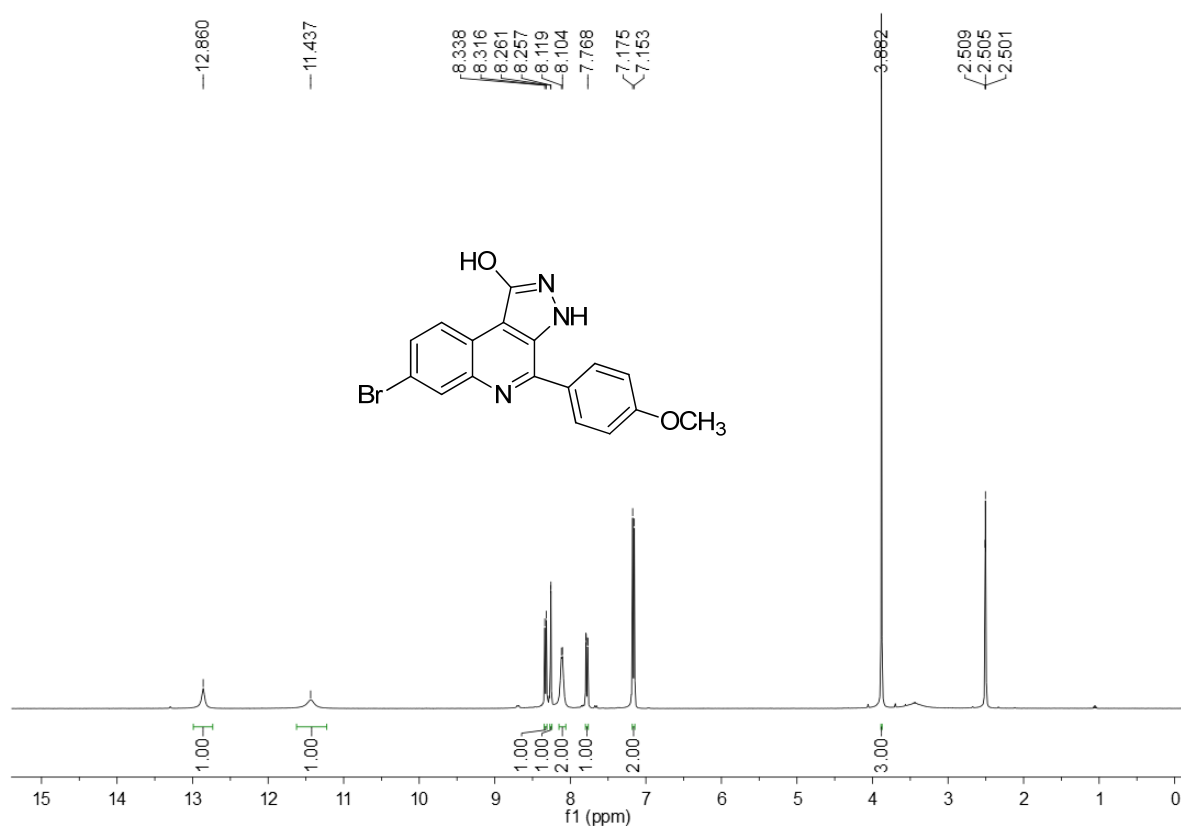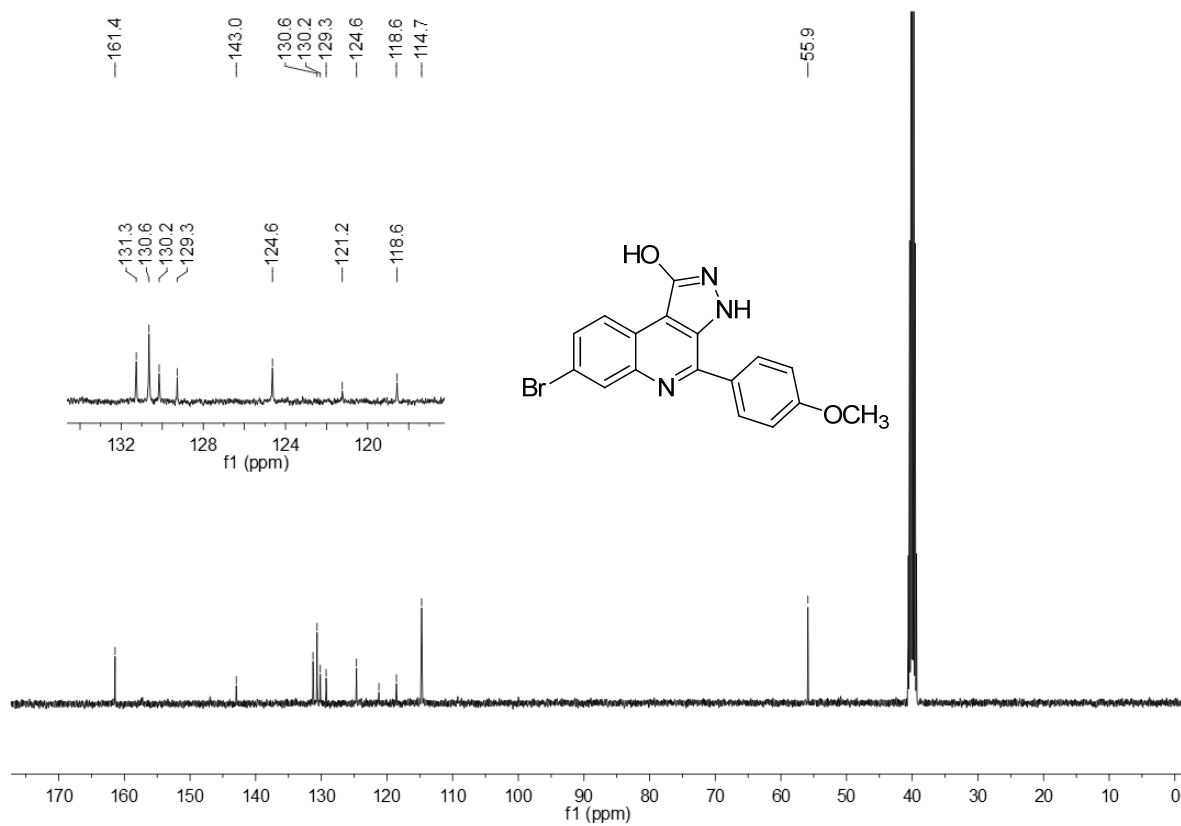

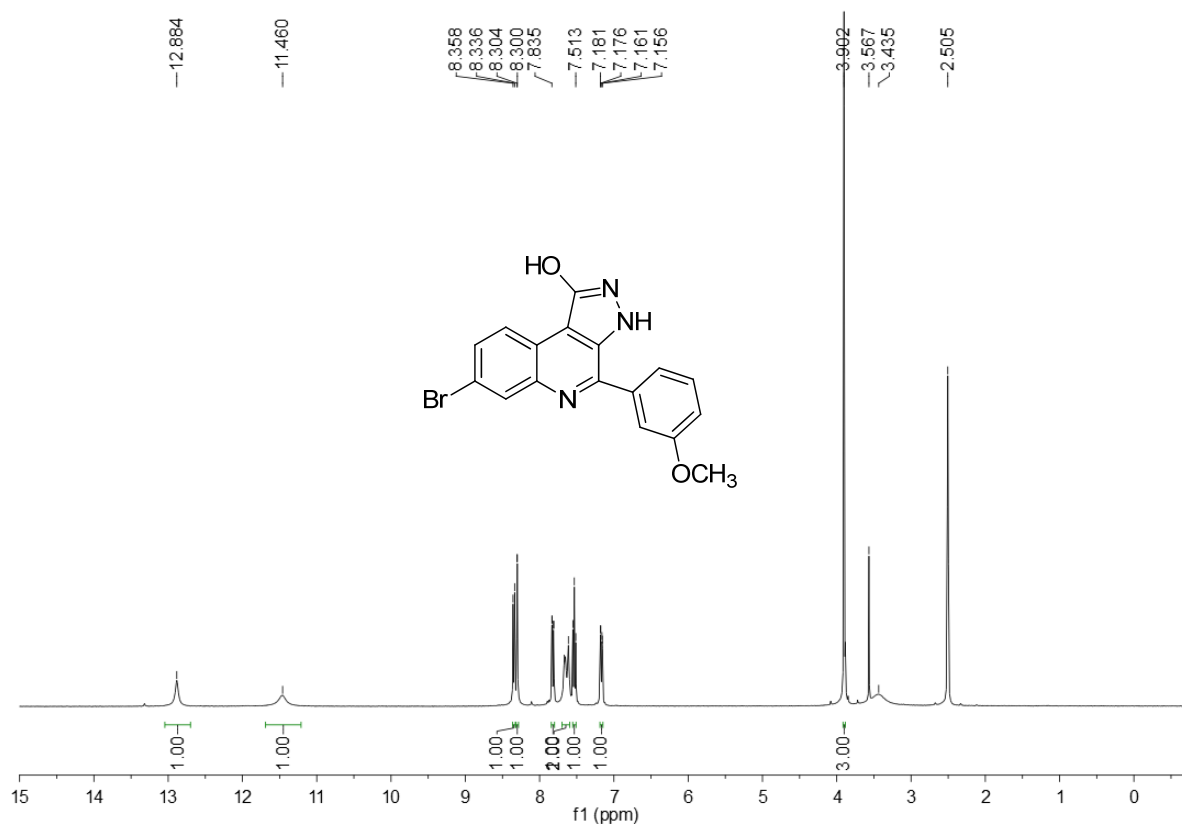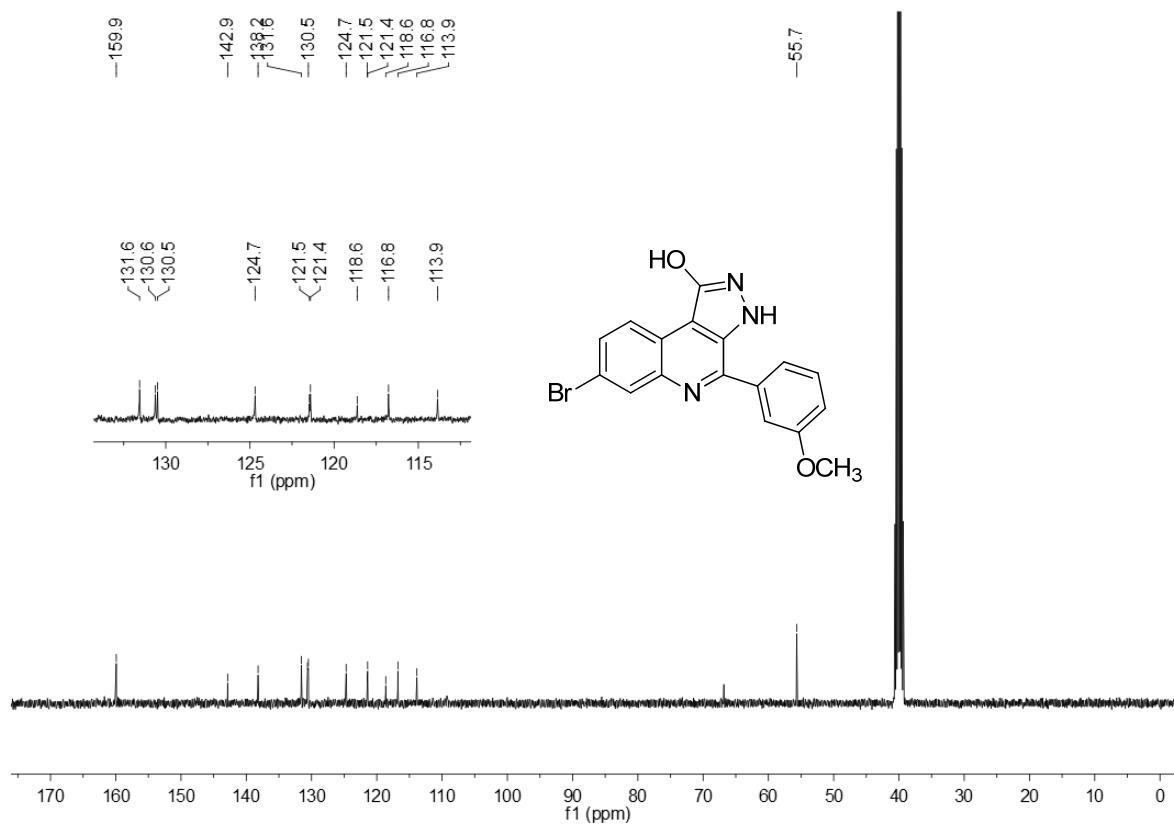

**<sup>13</sup>C NMR Spectrum of Compound 3ee**



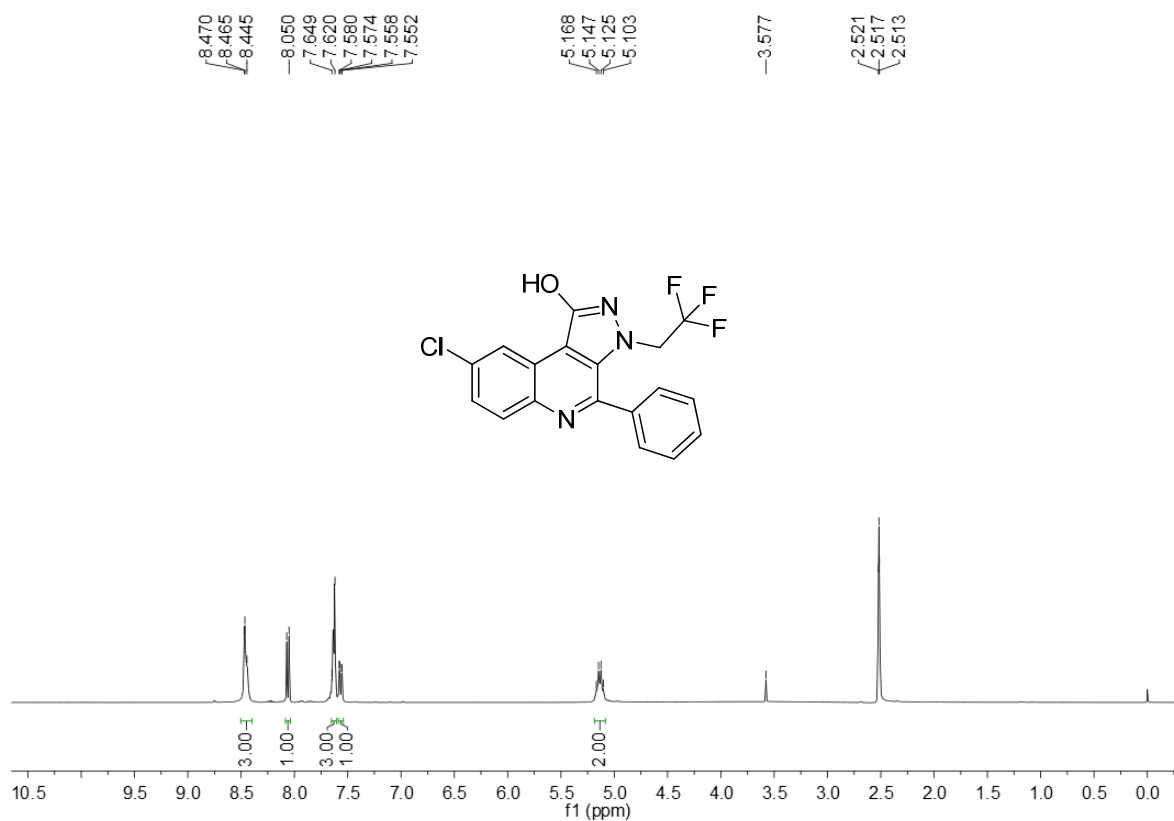

**<sup>1</sup>H NMR Spectrum of Compound 3ff**

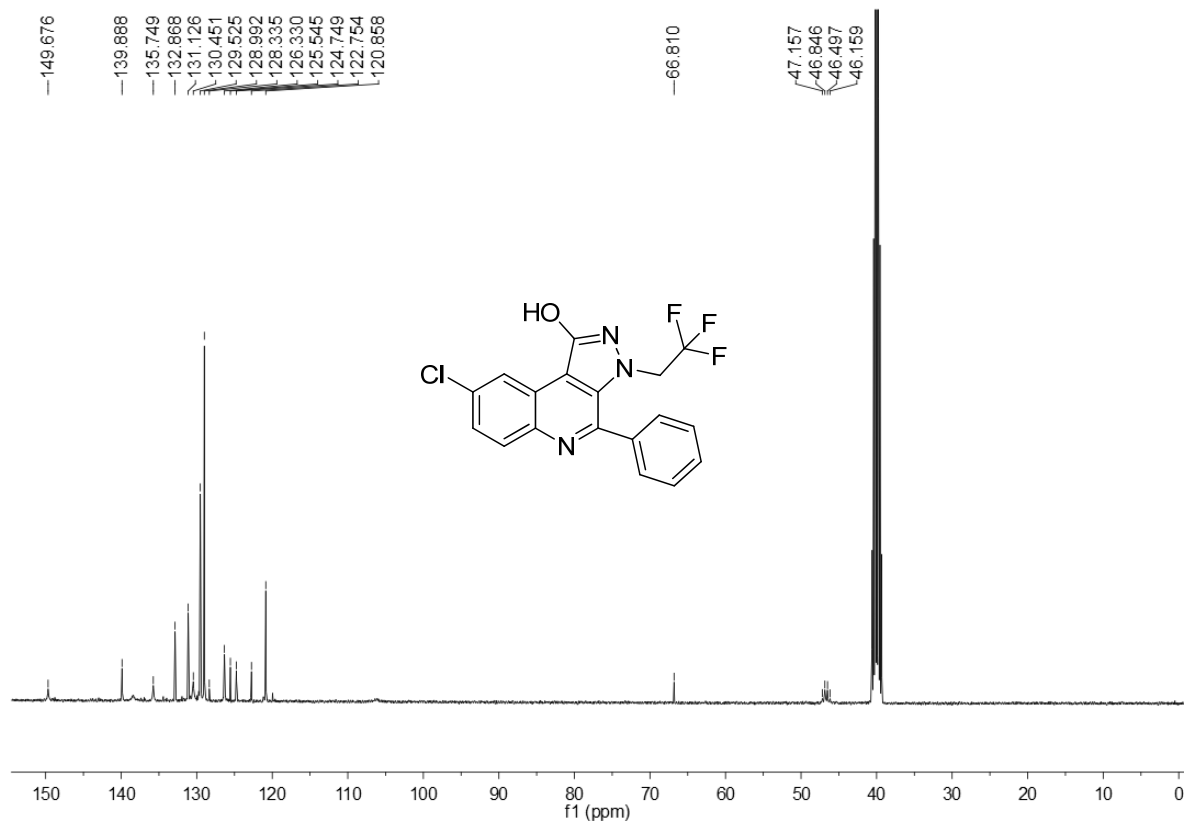

**<sup>13</sup>C NMR Spectrum of Compound 3ff**

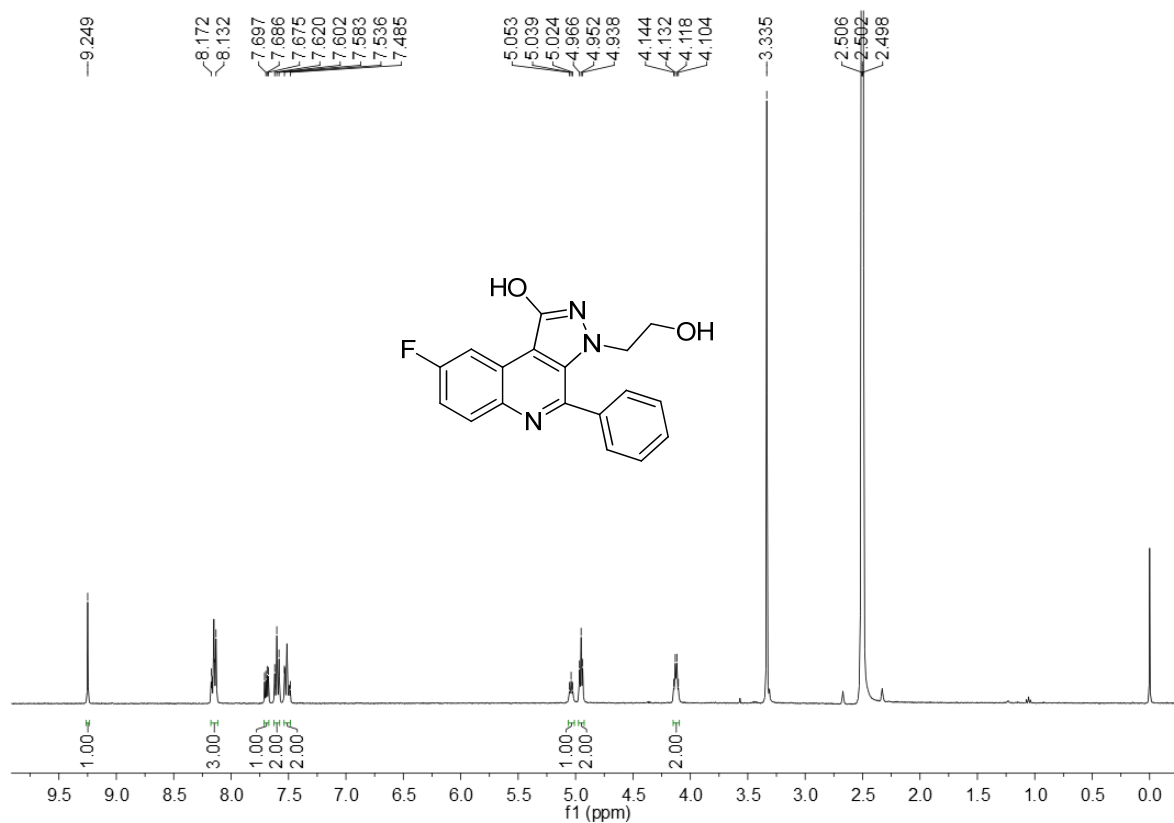

**<sup>1</sup>H NMR Spectrum of Compound 3gg**

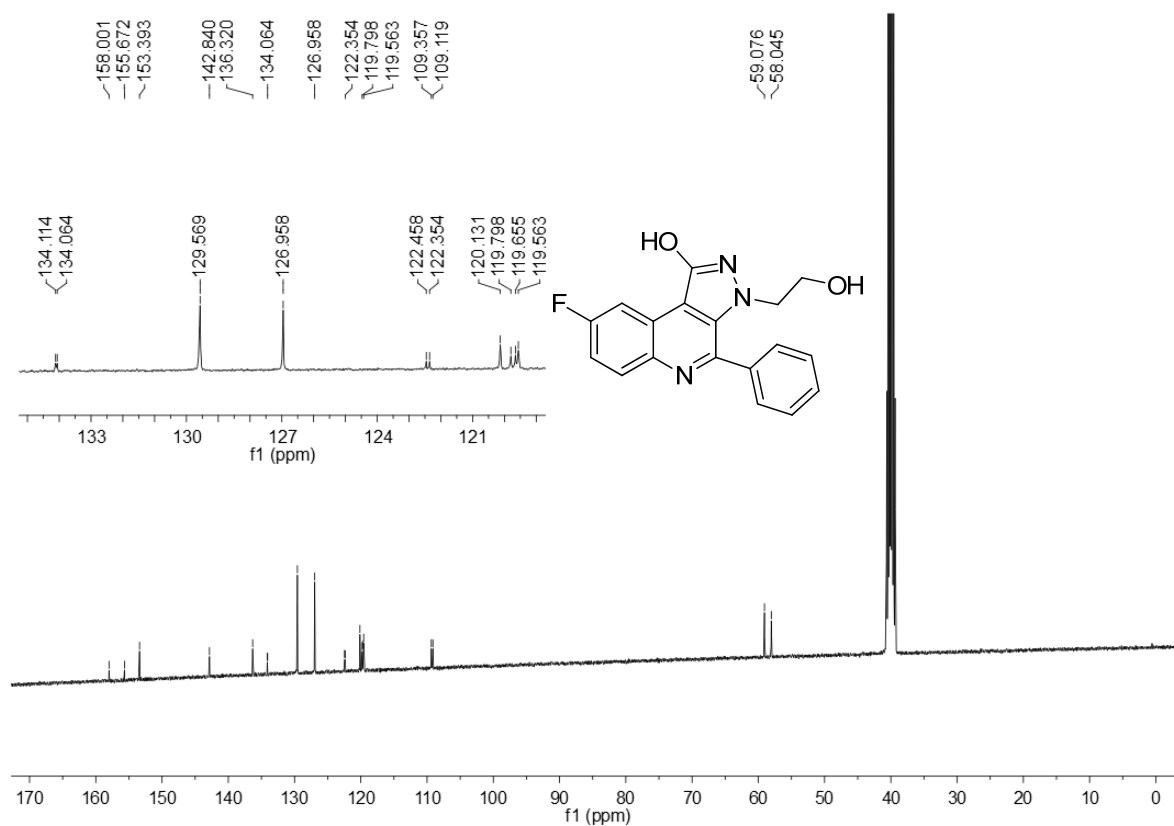

**<sup>13</sup>C NMR Spectrum of Compound 3gg**

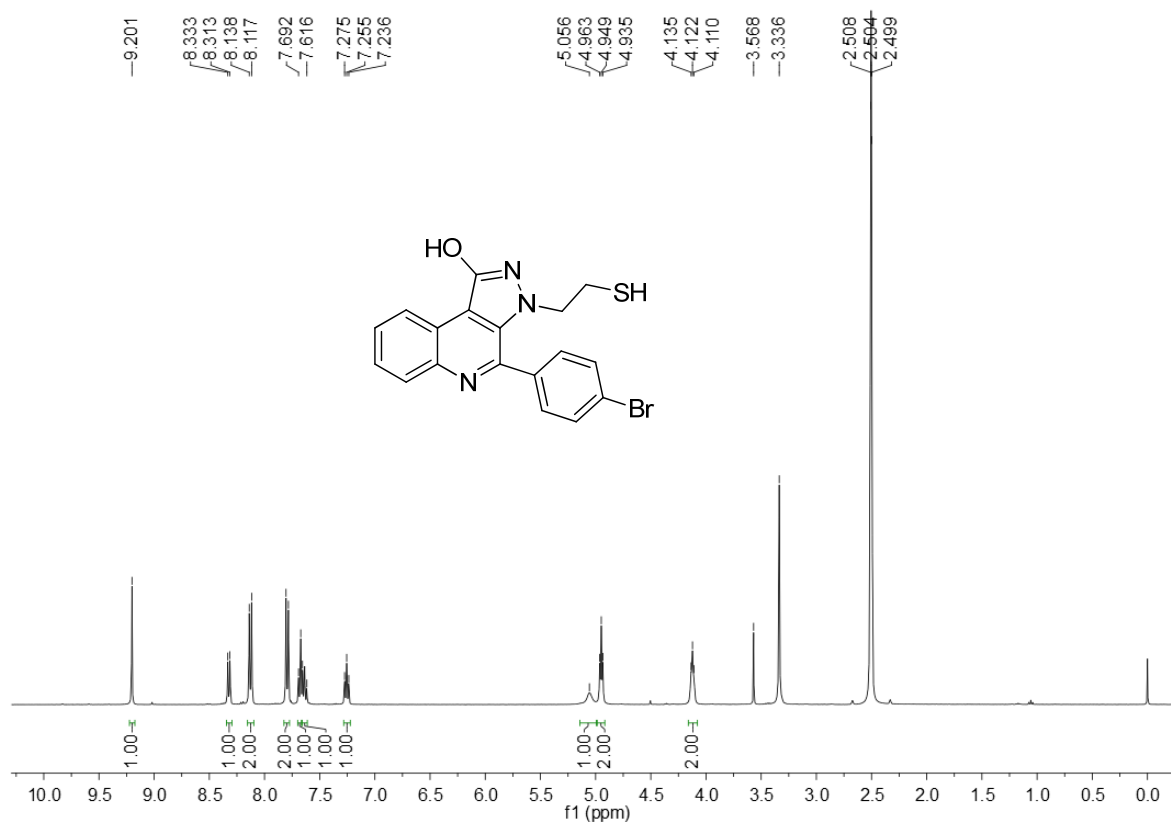

<sup>1</sup>H NMR Spectrum of Compound 3hh

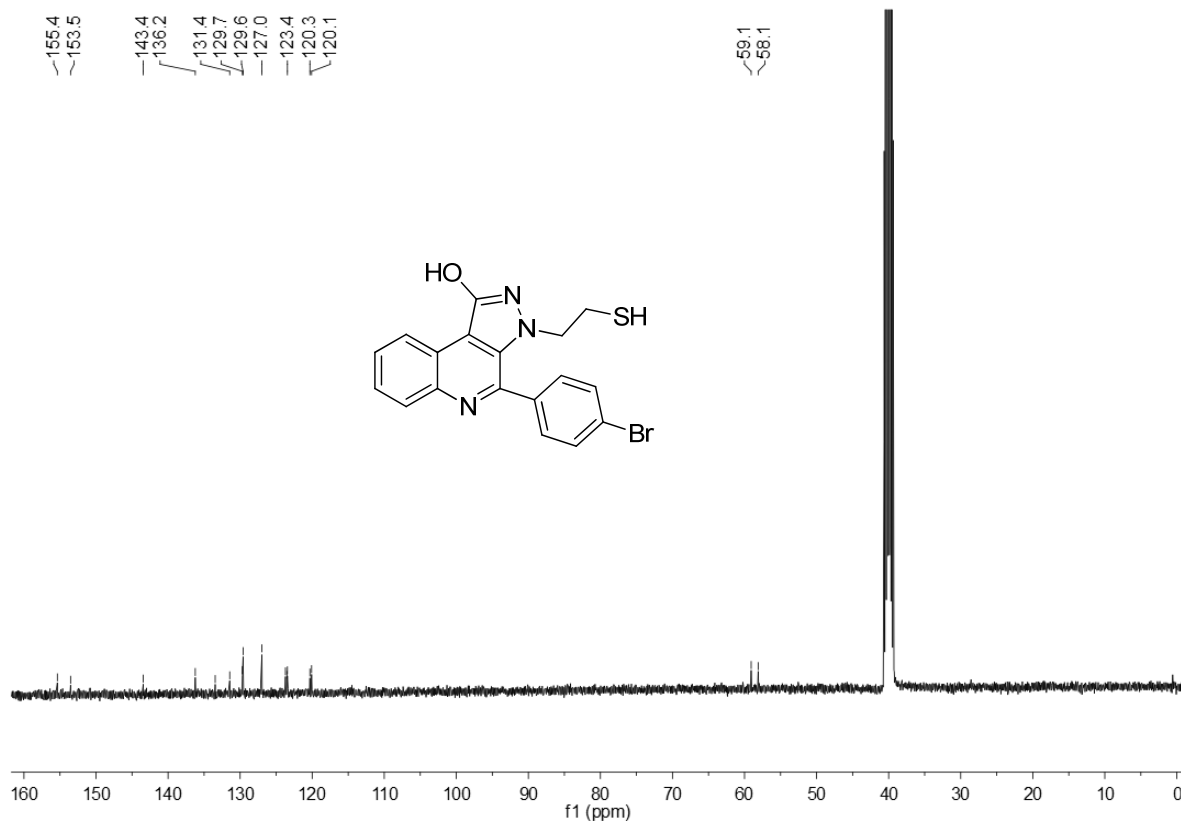

<sup>13</sup>C NMR Spectrum of Compound 3hh
